# Supplementary material for: Orbitally forced environmental changes during the accumulation of a Pliensbachian (Lower Jurassic) black shale in northern Iberia
Source: Copernicus journal article supplement (doi:10.5194/cp-2024-13), 2024-03-11
Supplement: Supplementary file 1 [file cp-2024-13-supplement-version2.pdf]

## SUPPLEMENTARY FIGURES AND TABLES TO THE PAPER

### Orbitally forced environmental changes during the accumulation of a Pliensbachian (Lower Jurassic) black shale in northern Iberia

Naroa Martínez-Braceras<sup>1,2</sup>; Aitor Payros<sup>1</sup>; Jaume Dinarès-Turell<sup>3</sup>; Idoia Rosales<sup>4</sup>;  
Javier Arostegi<sup>1</sup> and Roi Silva-Casal<sup>5</sup>

<sup>1</sup>Department of Geology, Faculty of Science and Technology, University of the Basque Country (UPV/EHU), P.O. Box 644, 48080 Bilbao, Spain

<sup>2</sup>Laboratorio de Evolución Humana, Departamento de Historia, Geografía y Comunicación, Universidad de Burgos, Edificio I+D+I, Plaza de Misael Bañuelos/n, 09001 Burgos, Spain

<sup>3</sup>Istituto Nazionale di Geofisica e Vulcanologia, Via di Vigna Murata 605, 00142 Rome, Italy

<sup>4</sup>Centro Nacional Instituto Geológico y Minero de España (IGME, CSIC), La Calera 1, Tres Cantos, 28760 Madrid, Spain

<sup>5</sup>Dpto. Dinàmica de la Terra i de l'Oceà, Facultat de Ciències de la Terra, Universitat de Barcelona, 08028 Barcelona, Spain.

## List of Figures

|                |   |
|----------------|---|
| Figure S1..... | 1 |
| Figure S2..... | 2 |
| Figure S3..... | 3 |
| Figure S4..... | 4 |
| Figure S5..... | 5 |
| Figure S6..... | 6 |

## List of Tables

|               |    |
|---------------|----|
| Table S1..... | 7  |
| Table S2..... | 14 |
| Table S3..... | 15 |
| Table S4..... | 17 |
| Table S5..... | 19 |



Figure S1. A) Geological map of the Santiurde de Reinosa area, where the herein studied motorway section (B) and the train station section studied by others (C) are located. Calcareous couplets in both Santiurde outcrops are numbered in white and bundles B8-B11 in green. Bed by-bed correlation between separate and discontinuous outcrops was carried out on visual grounds, by the identification of key beds with distinctive sedimentary features (mainly lithology and thickness) and characteristic bed arrangements in the succession.

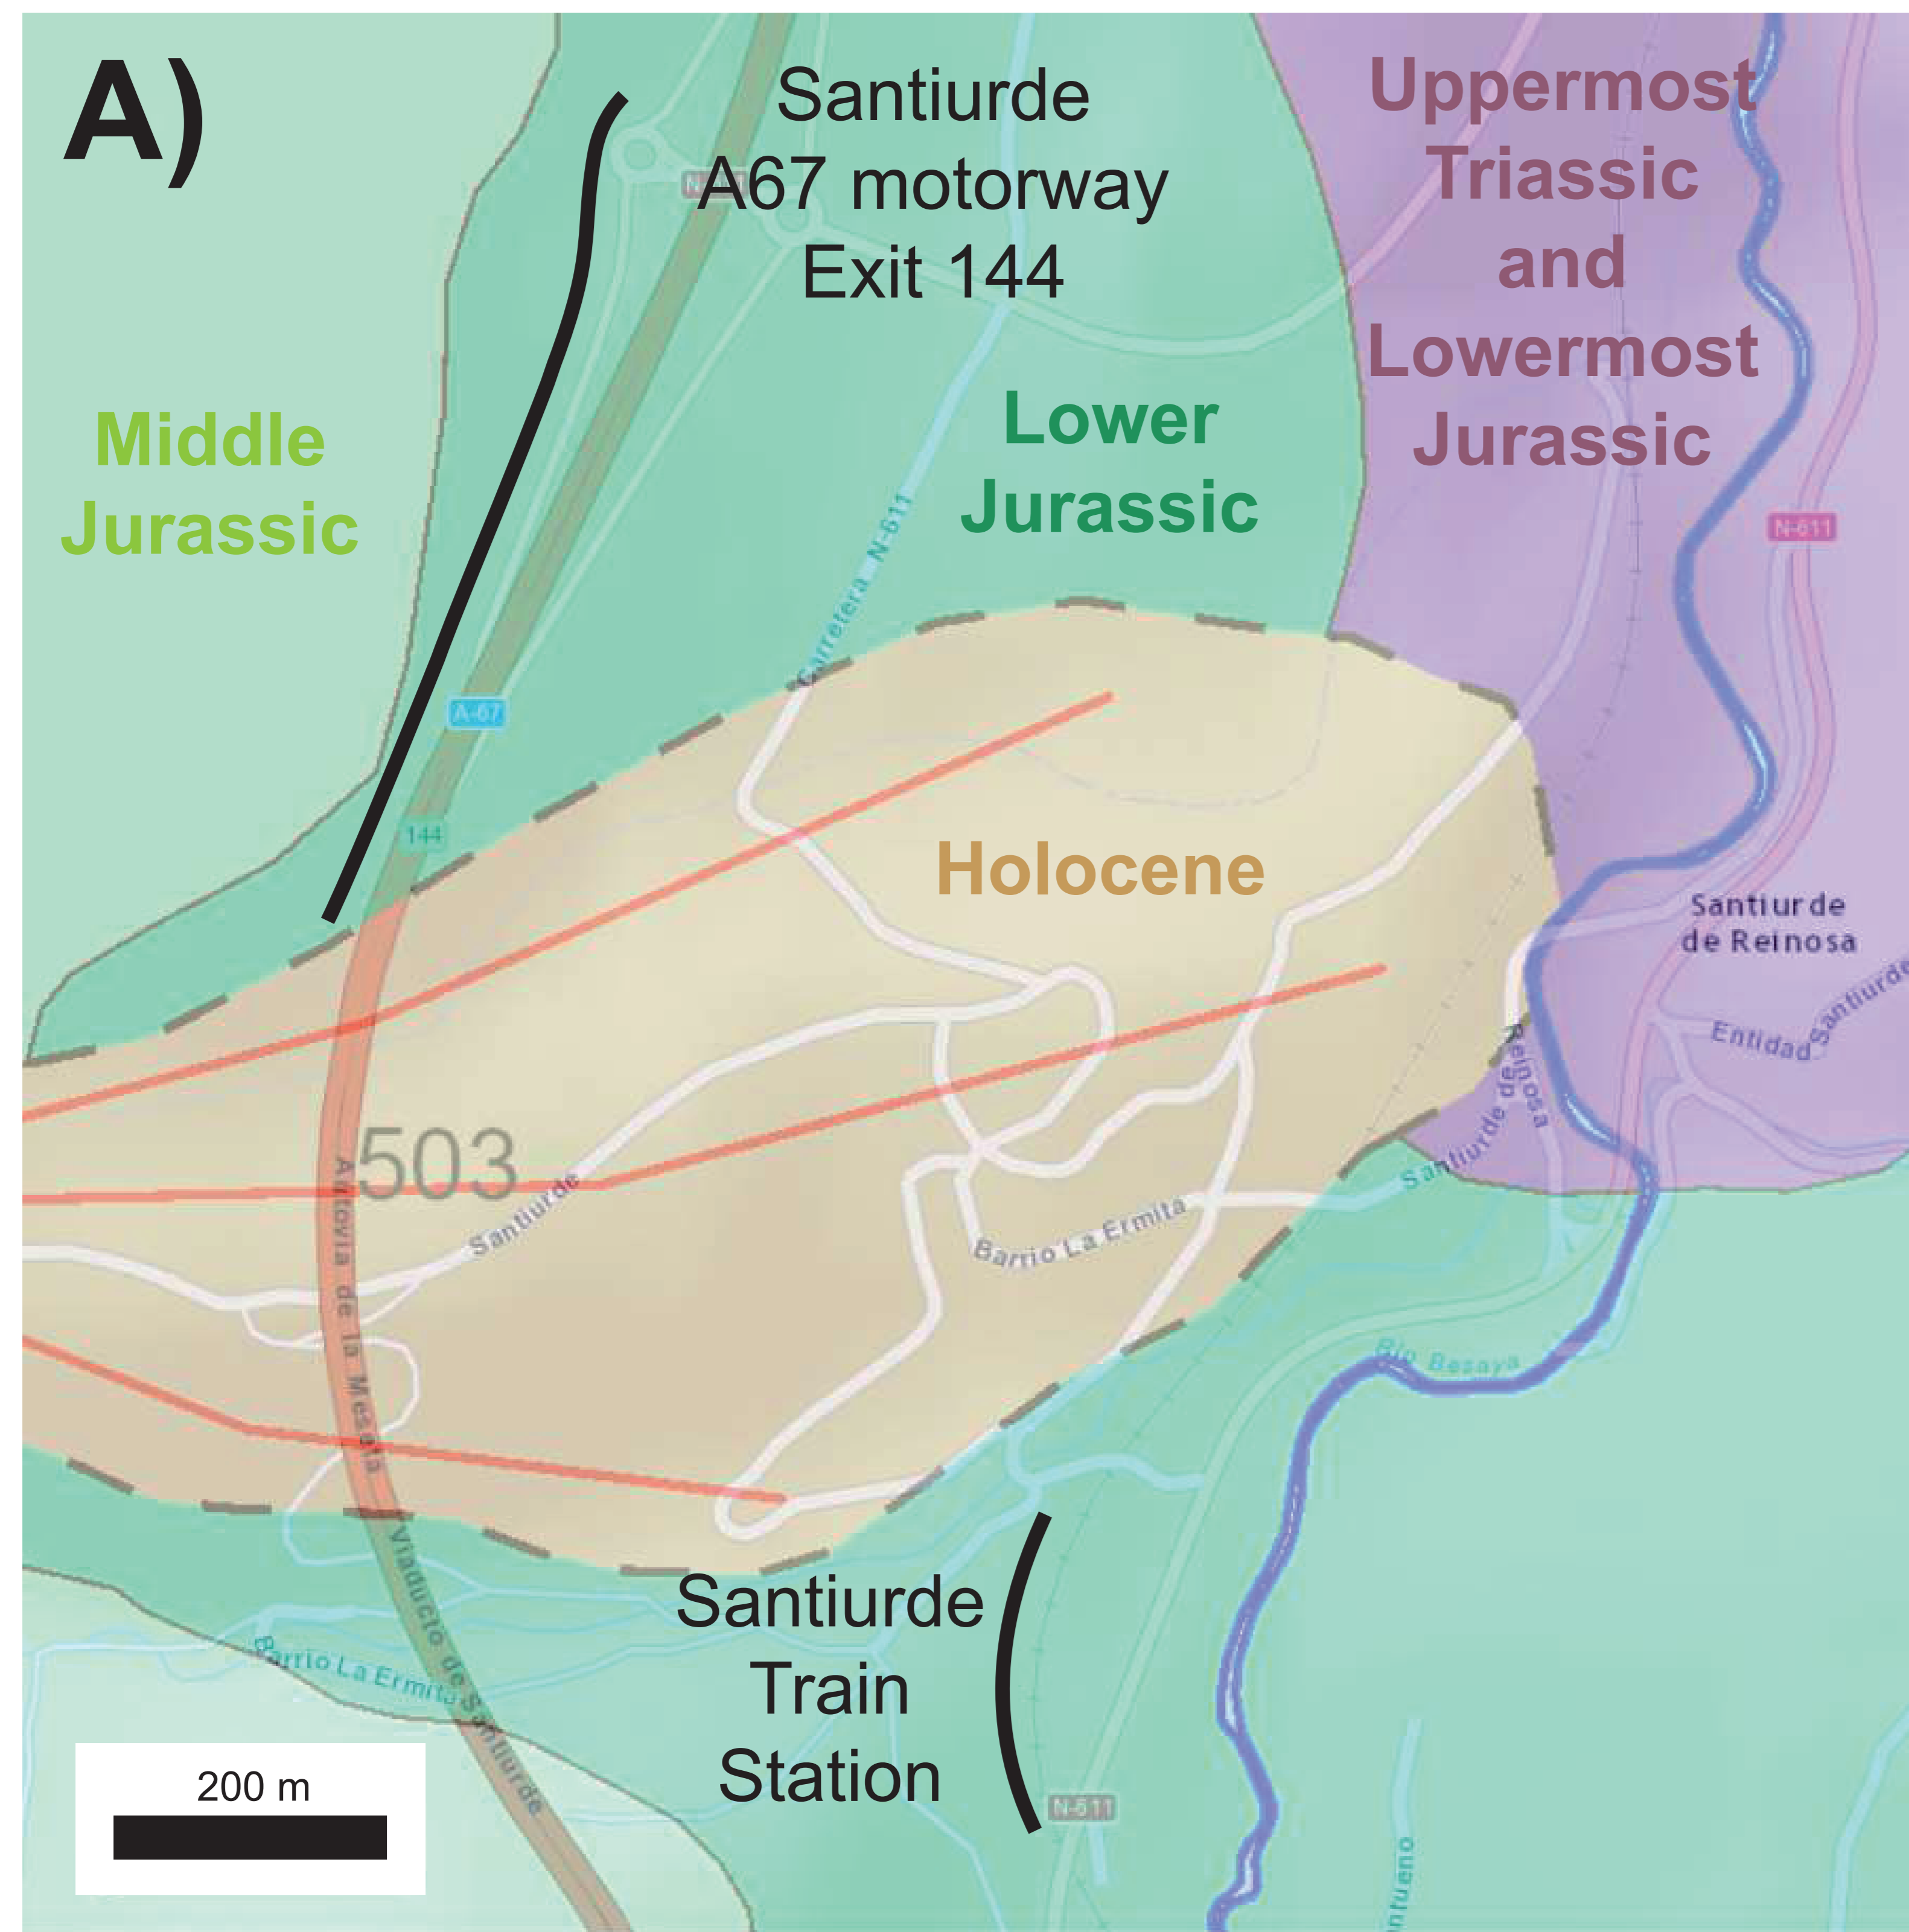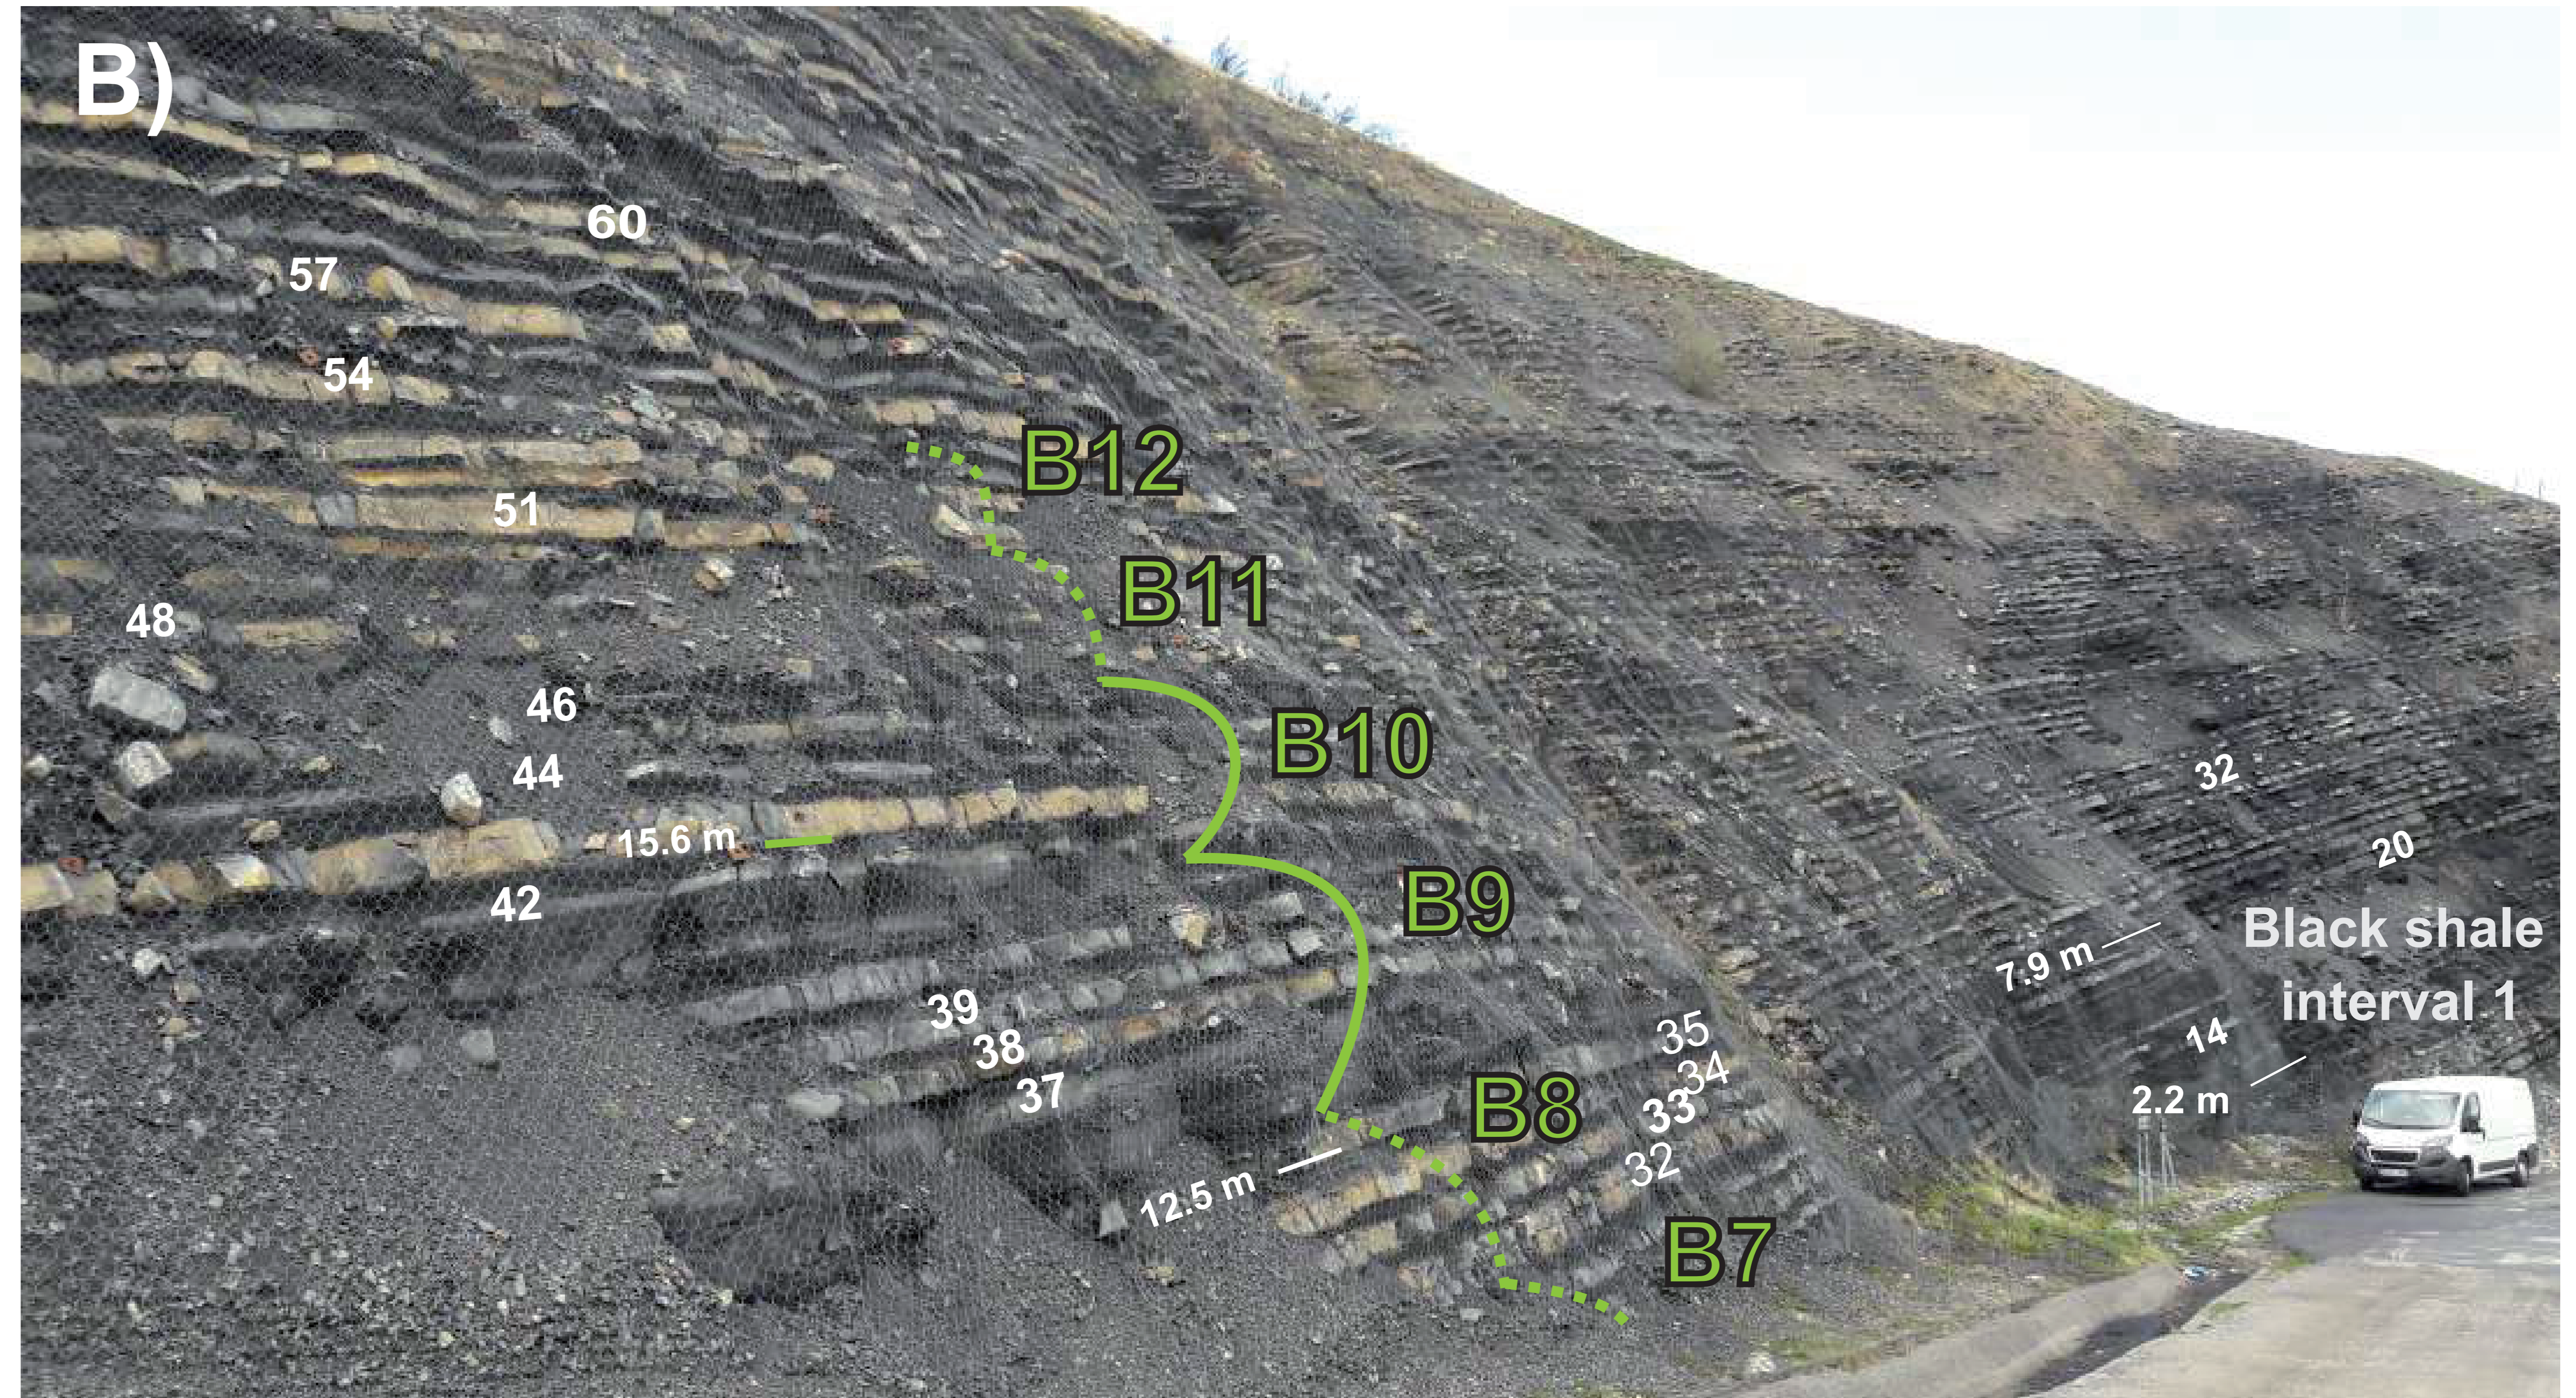

Santiurde de Reinosa (motorway)

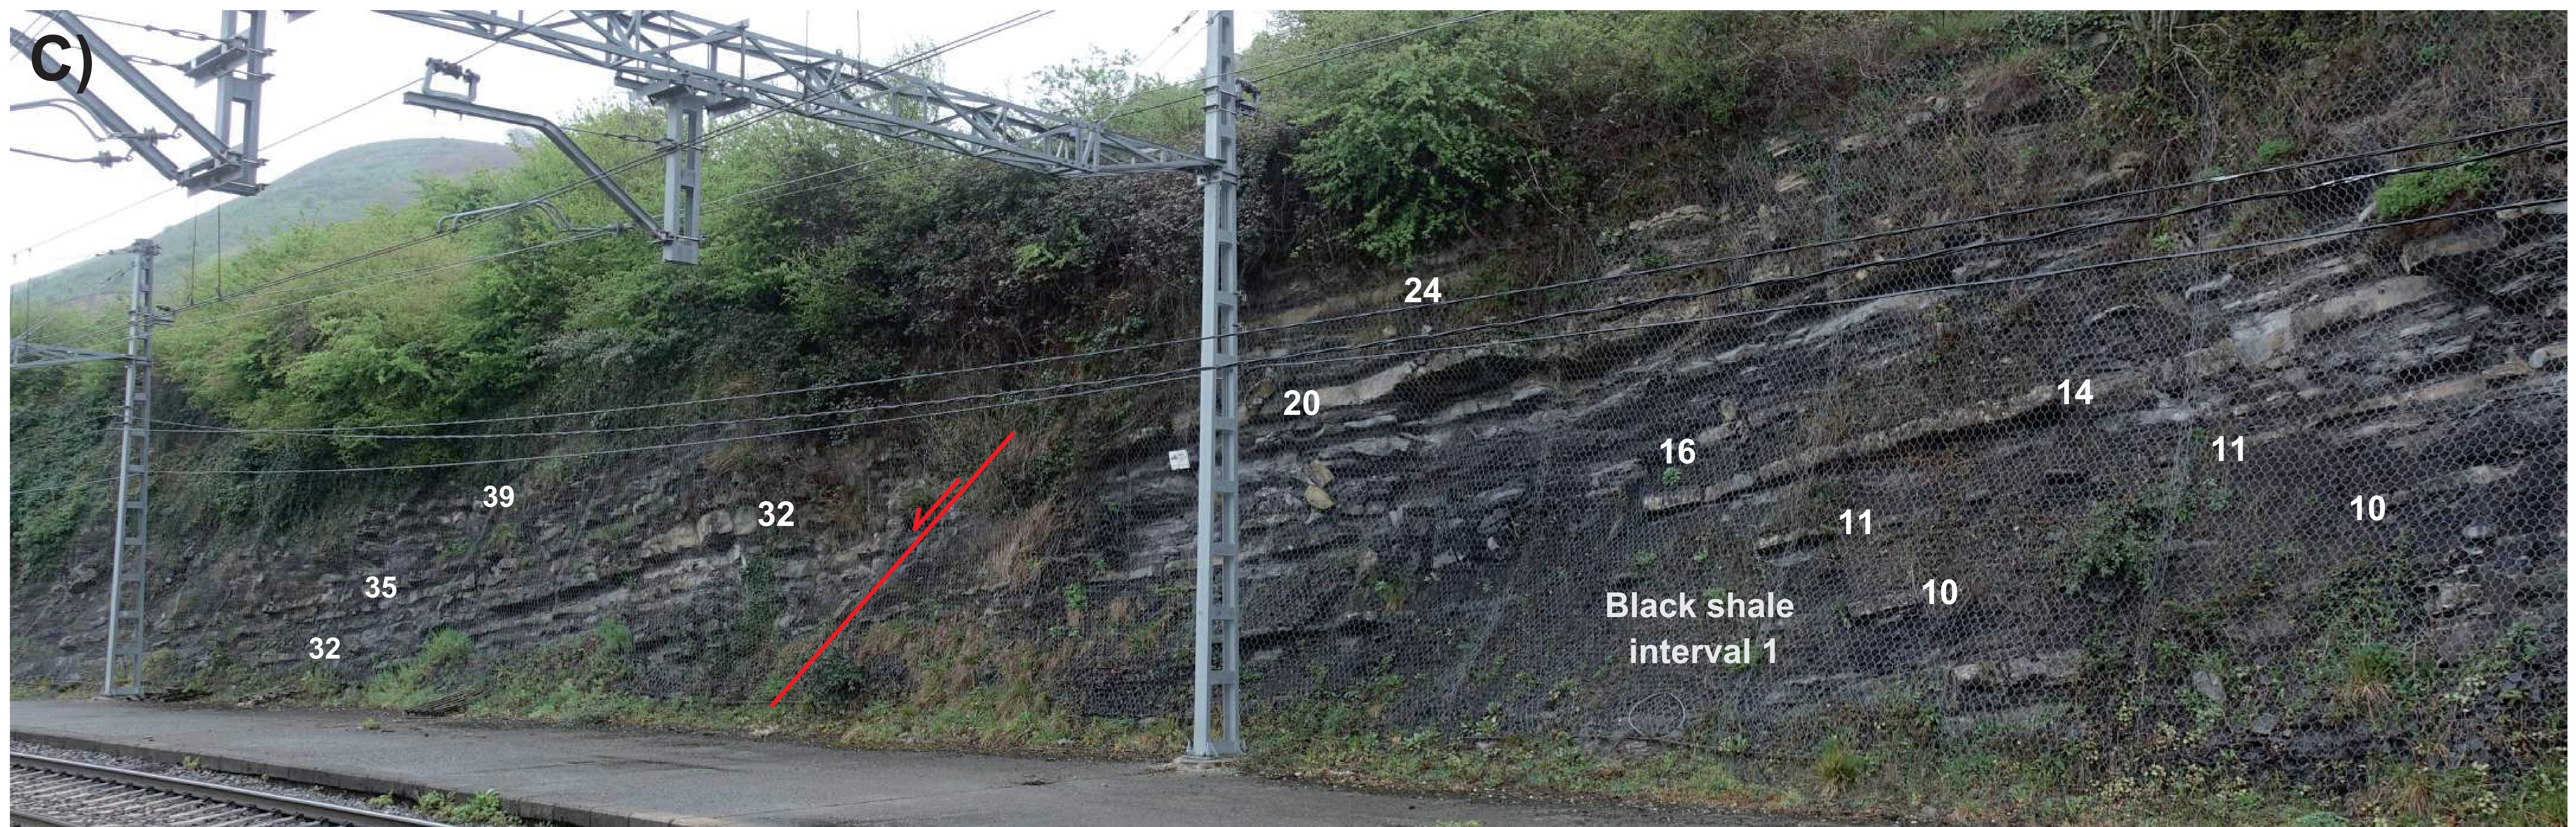

Santiurde de Reinosa (train station)



Figure S2. Stratigraphic log and chronostratigraphy of the studied section, showing the MS and colour data curves. Bundles (B) and couplets (C) identified in the sedimentary alternation are numbered in ascending stratigraphic order. The grey background shows the extent of the Uptonia jamesoni Black Shale 1, and the pink interval in its upper part shows the interval studied herein in detail. Close-ups of the colour and %CaCO<sub>3</sub> curves of the interval studied in detail are shown, as well as the crossplot of both variables and their Pearson correlation value (r). Crossplots of colour vs MS of the complete section and %CaCO<sub>3</sub> vs MS of the interval studied in detail are also shown.

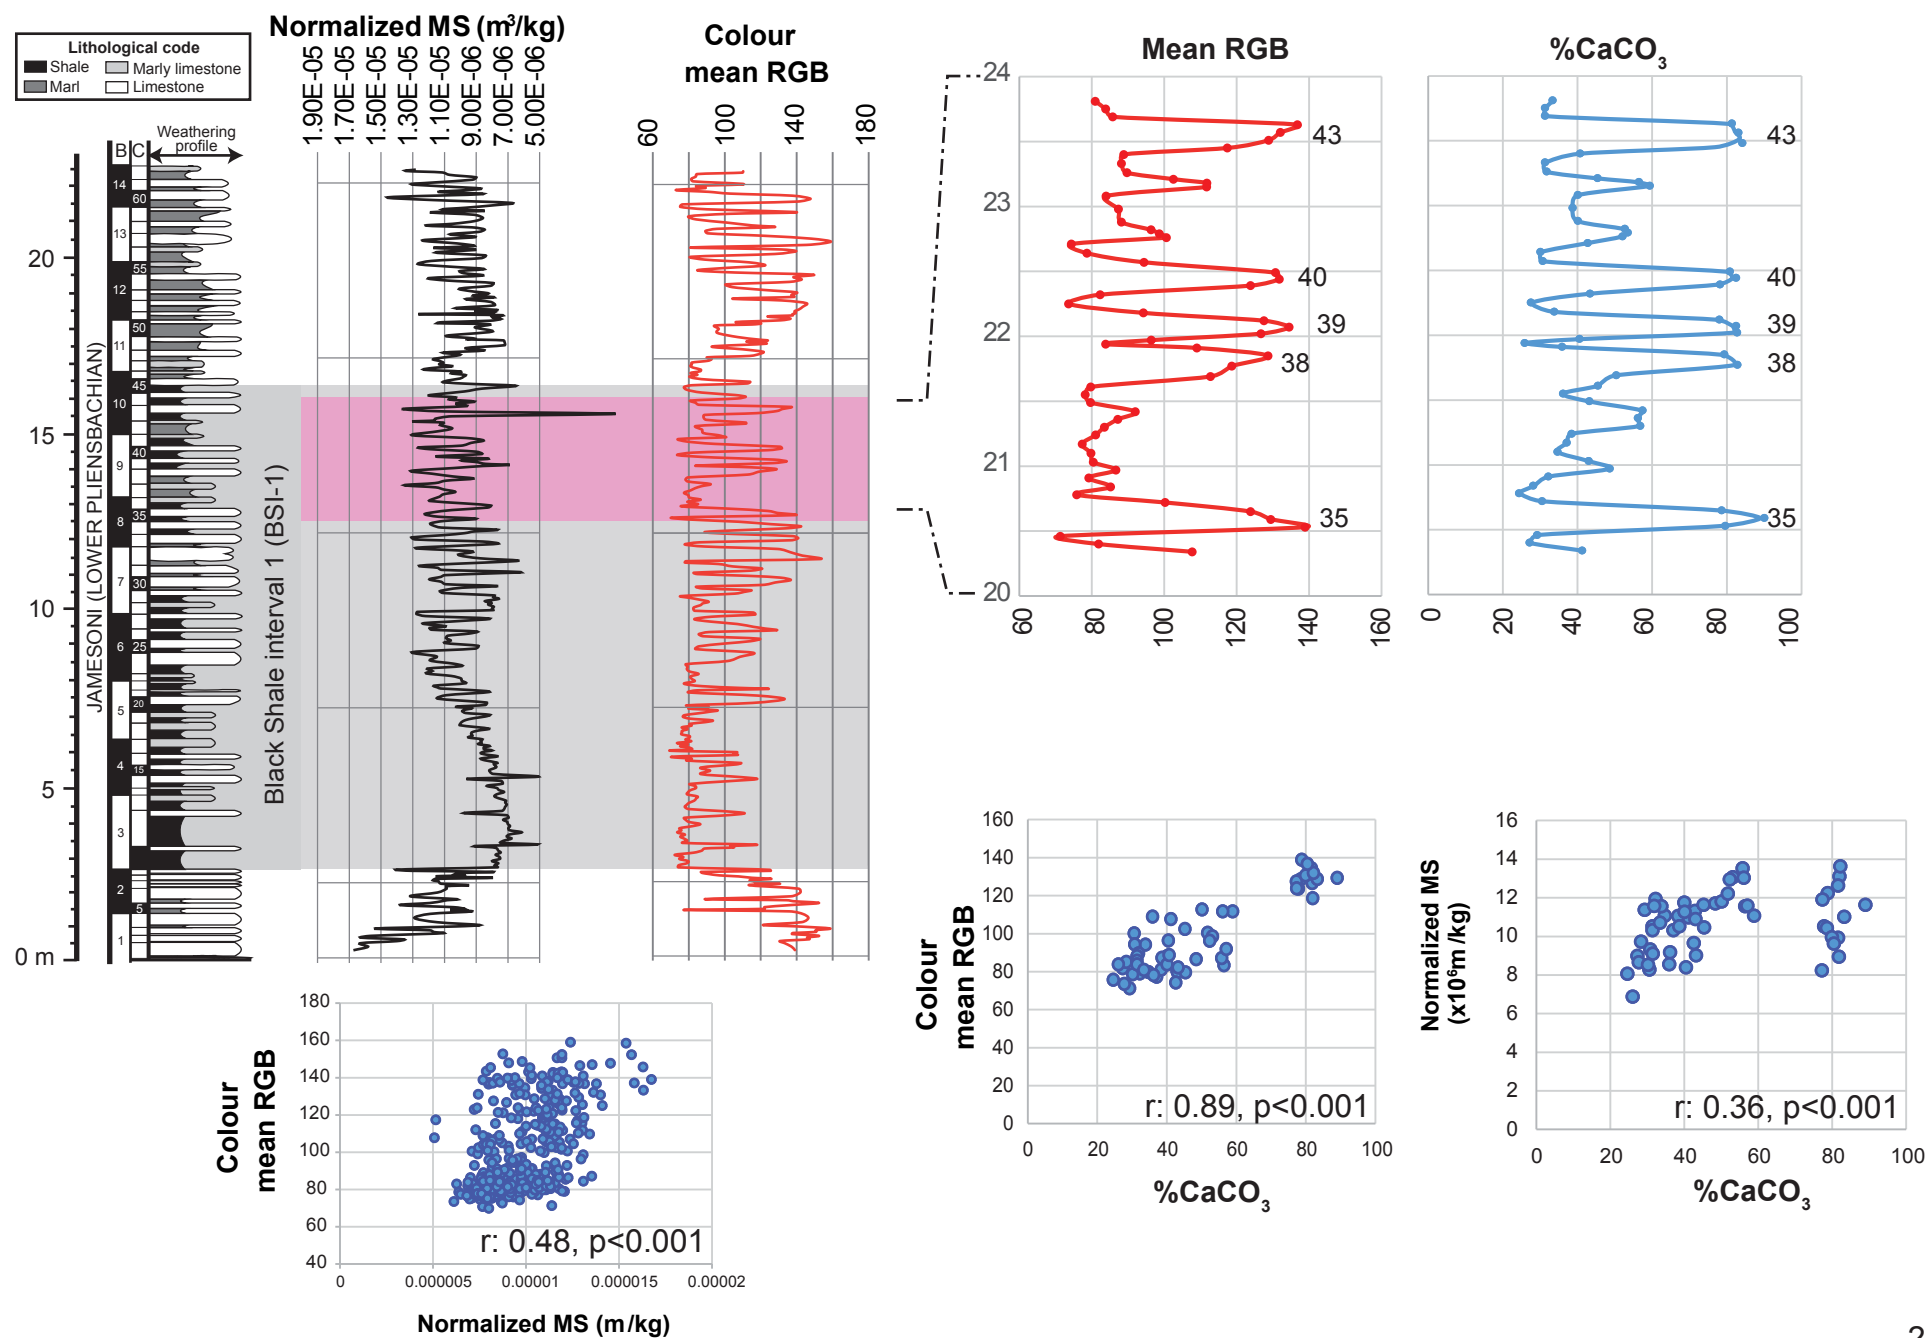



Figure S3. A) Thermomagnetic curve of a limestone sample (C43L) indicating the presence of an original ferromagnetic phase (magnetite). Secondary magnetic iron sulfides (pyrrhotite?) are created upon heating the sample up to 700°C as inferred from the cooling curve. B) Isothermal remanent magnetization (IRM) acquisition curves for a limestone (C43L) and marl (C43M) samples compatible with magnetite as the ferromagnetic carrier. Note the higher saturation remanence for the limestone sample.

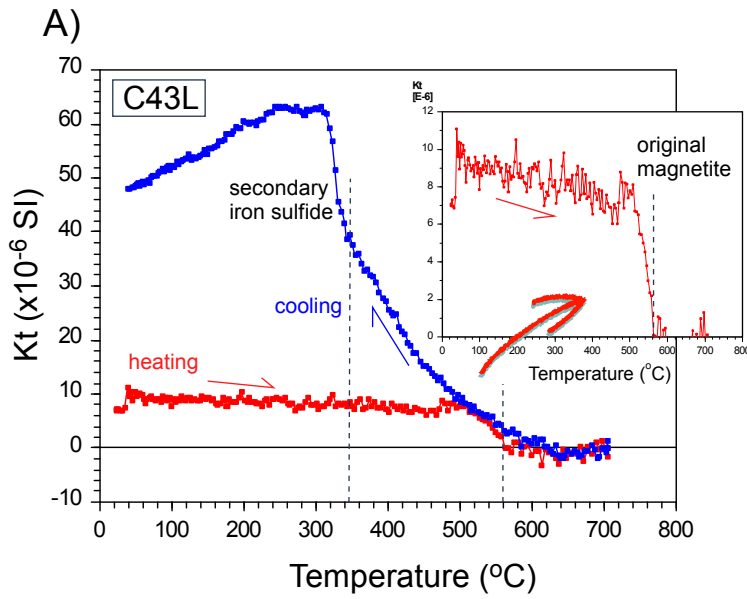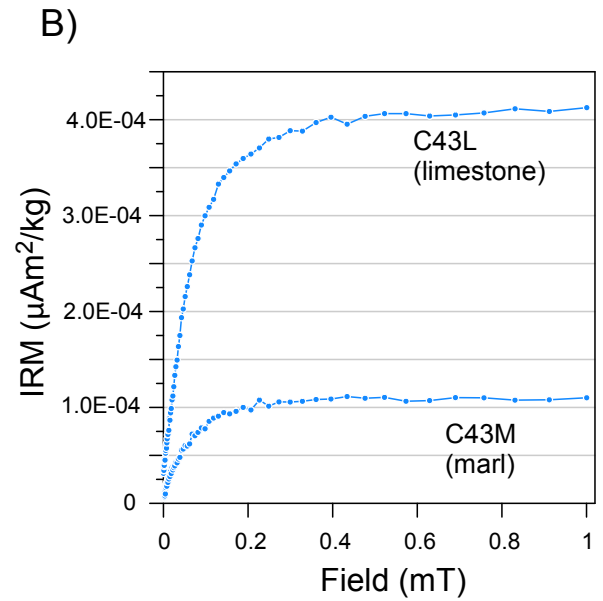



Figure S4. Stratigraphic log and chronostratigraphy of the studied section, showing the detrended MS curve. Bundles (B) and couplets (C) identified in the sedimentary alternation are numbered in ascending stratigraphic order. The 2n-MTM and EHA spectra of the MS data series are presented. Limestones usually present higher magnetic susceptibility values than adjacent marls/shales. However, the MS data series displays a greater dispersion and a spikier appearance than the colour and %CaCO<sub>3</sub> data series, which very likely explains the low correlation coefficient between the MS data series and the colour and %CaCO<sub>3</sub> data series (Fig. S2). The MS signal is mainly carried by magnetite content (Fig.S3), which could be either detrital in origin or related to postdepositional changes in redox state. The influence of early diagenetic processes, such as partial replacement of pyrite with iron oxides at more oxygenated conditions, might explain the high variability of the MS curve. Notwithstanding the potential flaws of the MS data series, the spectral analysis shows that it records a significant periodicity with an average thickness equivalent to that of precession couplets. Despite being less prominent, cycles correlatable with those attributed to obliquity(?), short eccentricity (bundles) and long eccentricity in the colour spectral analysis series can also be identified in the MS spectra.

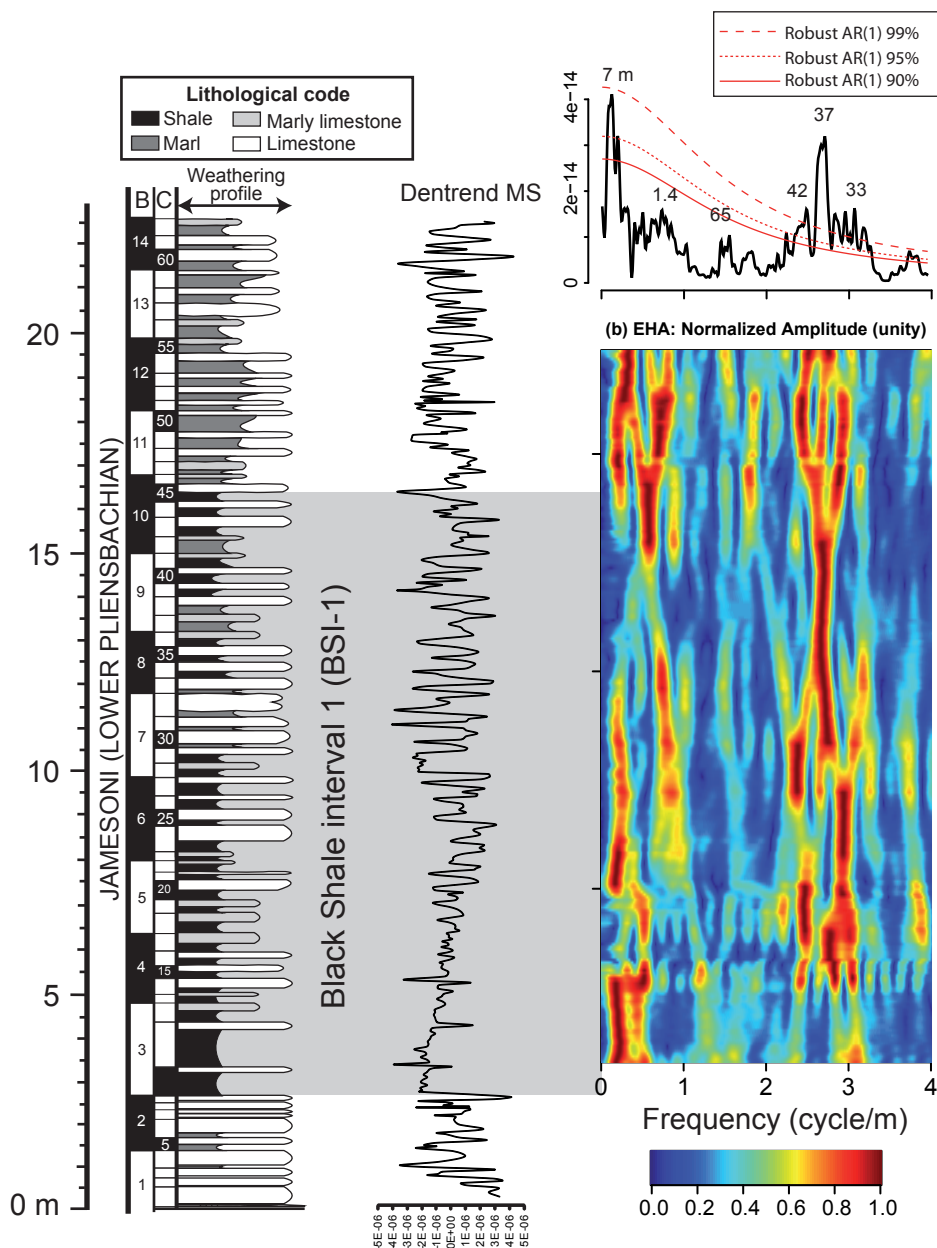



Figures S5. A) Bulk stable isotope composition of the Santiurde succession. Note that samples are organized following the normal diagenetic trend controlled by local carbonate dissolution and reprecipitation during burial. B) Crossplot of  $\delta^{13}\text{C}_{\text{carb}}$  and  $\% \text{CaCO}_3$  content of the interval studied in detail (limestone and marly limestone samples: white dots; marl and shale samples: black dots).

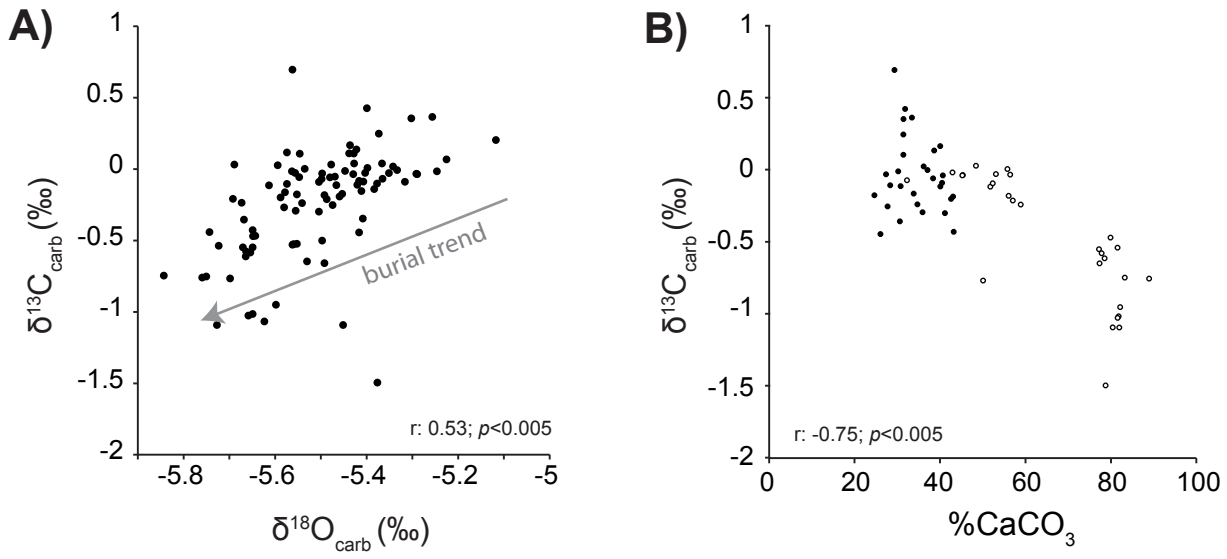



Figure S6. Crossplots between several diagenetic sensitive elements (Fe, Mn, Sr and  $^{18}\text{O}_{\text{carb}}$ ).

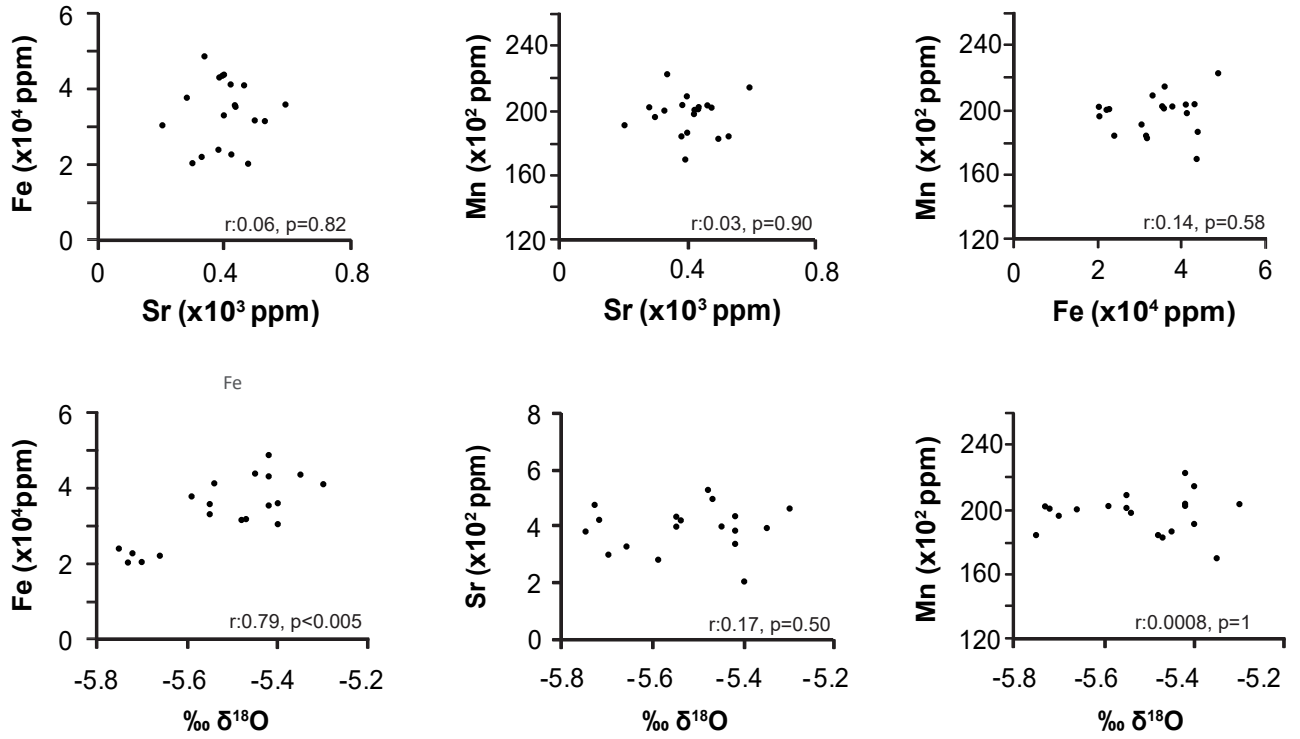

Table S1. Stratigraphic location of the Santiurde samples and their mass-normalized low-field magnetic susceptibility (MS) and colours (mean RGB) values.

| Stratigraphic level (m) | Sample Label | Normalized Ms (m <sup>3</sup> /kg) | Colour (mean RGB) |
|-------------------------|--------------|------------------------------------|-------------------|
| 0.17                    | ST99         | 1.67442E-05                        | 138.99            |
| 0.27                    | ST100        | 1.5824E-05                         | 137.081           |
| 0.37                    | ST101        | 1.63145E-05                        | 133.206           |
| 0.43                    | ST102        | 1.40087E-05                        | 130.76            |
| 0.48                    | ST103        | 1.35599E-05                        | 146.978           |
| 0.53                    | ST104        | 1.62909E-05                        | 145.736           |
| 0.58                    | ST105        | 1.56725E-05                        | 152.26            |
| 0.63                    | ST106        | 1.25637E-05                        | 137.437           |
| 0.66                    | ST107        | 1.10402E-05                        | 137.996           |
| 0.69                    | ST108        | 1.16674E-05                        | 150.653           |
| 0.74                    | ST109        | 1.19349E-05                        | 150.601           |
| 0.79                    | ST110        | 1.53759E-05                        | 158.476           |
| 0.85                    | ST111        | 1.0282E-05                         | 139.377           |
| 0.89                    | ST112        | 8.77446E-06                        | 121.155           |
| 0.97                    | ST113        | 1.14479E-05                        | 142.776           |
| 1.09                    | ST114        | 1.29006E-05                        | 146.484           |
| 1.21                    | ST115        | 1.19065E-05                        | 143.122           |
| 1.28                    | ST116        | 9.27092E-06                        | 135.905           |
| 1.32                    | ST117        | 1.0636E-05                         | 77.076            |
| 1.35                    | ST118        | 9.71365E-06                        | 121.982           |
| 1.4                     | ST119        | 1.04224E-05                        | 121.994           |
| 1.46                    | ST120        | 1.37901E-05                        | 136.69            |
| 1.52                    | ST121        | 1.19297E-05                        | 152.407           |
| 1.57                    | ST122        | 1.11972E-05                        | 138.032           |
| 1.6                     | ST123        | 1.08411E-05                        | 134.172           |
| 1.63                    | ST124        | 1.02444E-05                        | 88.85             |
| 1.71                    | ST125        | 1.31528E-05                        | 136.667           |
| 1.82                    | ST126        | 1.14434E-05                        | 142.014           |
| 1.93                    | ST127        | 1.08706E-05                        | 140.868           |
| 2                       | ST128        | 1.08632E-05                        | 113.397           |
| 2.03                    | ST129        | 9.45017E-06                        | 130.765           |
| 2.06                    | ST130        | 1.12191E-05                        | 118.475           |
| 2.1                     | ST131        | 1.13269E-05                        | 115.795           |
| 2.13                    | ST132        | 1.139E-05                          | 114.045           |
| 2.16                    | ST133        | 1.17406E-05                        | 125.946           |
| 2.19                    | ST134        | 1.15517E-05                        | 115.138           |
| 2.21                    | ST135        | 7.94355E-06                        | 107.688           |
| 2.23                    | ST136        | 1.15176E-05                        | no data           |
| 2.25                    | ST137        | 9.75741E-06                        | 97.151            |
| 2.3                     | ST138        | 1.0324E-05                         | 91.159            |
| 2.33                    | ST139        | 9.77143E-06                        | 87.5              |
| 2.36                    | ST140        | 7.97792E-06                        | 86.845            |
| 2.4                     | ST141        | 1.30297E-05                        | 125.475           |
| 2.45                    | ST142        | 1.40977E-05                        | 125.018           |
| 2.5                     | ST143        | 1.17973E-05                        | 105.376           |
| 2.57                    | ST144        | 7.66919E-06                        | 74.267            |
| 2.6                     | ST145        | 7.8318E-06                         | 74.381            |
| 2.66                    | ST146        | 7.61717E-06                        | 79.095            |
| 2.72                    | ST147        | 8.00354E-06                        | 79.64             |
| 2.78                    | ST148        | 7.51443E-06                        | 74.741            |
| 2.84                    | ST149        | 7.54457E-06                        | 76.958            |



|      |       |             |         |
|------|-------|-------------|---------|
| 2.9  | ST150 | 7.7758E-06  | 72.247  |
| 2.96 | ST151 | 7.46452E-06 | 82.71   |
| 3.02 | ST152 | 7.61998E-06 | 87.29   |
| 3.08 | ST153 | 7.70374E-06 | 88.963  |
| 3.11 | ST154 | 7.96278E-06 | 105.022 |
| 3.15 | ST155 | 9.04677E-06 | 103.19  |
| 3.19 | ST156 | 5.14505E-06 | 117.398 |
| 3.24 | ST157 | 7.46569E-06 | 76.518  |
| 3.3  | ST158 | 7.27616E-06 | 79.128  |
| 3.36 | ST159 | 6.78114E-06 | 77.547  |
| 3.42 | ST160 | 7.07834E-06 | 75.285  |
| 3.48 | ST161 | 6.89781E-06 | 77.862  |
| 3.54 | ST162 | 6.12822E-06 | 73.574  |
| 3.6  | ST163 | 6.90624E-06 | 75.942  |
| 3.66 | ST164 | 6.97805E-06 | 74.878  |
| 3.72 | ST165 | 6.87322E-06 | 82.012  |
| 3.78 | ST166 | 7.01549E-06 | 86.408  |
| 3.84 | ST167 | 7.05331E-06 | 80.169  |
| 3.9  | ST168 | 7.30004E-06 | 78.327  |
| 3.96 | ST169 | 6.95972E-06 | 77.523  |
| 4.03 | ST170 | 7.0984E-06  | 100.508 |
| 4.09 | ST171 | 9.78964E-06 | 111.107 |
| 4.15 | ST172 | 7.40183E-06 | 99.022  |
| 4.21 | ST173 | 7.23596E-06 | 79.952  |
| 4.27 | ST174 | 7.18182E-06 | 77.786  |
| 4.33 | ST175 | 7.07744E-06 | 78.835  |
| 4.39 | ST176 | 7.17207E-06 | 80.258  |
| 4.45 | ST177 | 7.14103E-06 | 83.012  |
| 4.51 | ST178 | 7.57382E-06 | 84.048  |
| 4.57 | ST179 | 7.85471E-06 | 84.834  |
| 4.63 | ST180 | 7.69114E-06 | 79.104  |
| 4.69 | ST181 | 7.25102E-06 | 79.565  |
| 4.75 | ST182 | 7.57999E-06 | 80.9    |
| 4.81 | ST183 | 7.7201E-06  | 83.913  |
| 4.87 | ST184 | 8.33228E-06 | 83.611  |
| 4.93 | ST185 | 7.33936E-06 | 80.676  |
| 5.01 | ST186 | 7.44357E-06 | 102.363 |
| 5.07 | ST187 | 9.56652E-06 | 117.983 |
| 5.13 | ST188 | 5.0797E-06  | 107.729 |
| 5.21 | ST1   | 7.93595E-06 | 86.807  |
| 5.31 | ST2   | 8.18208E-06 | 91.896  |
| 5.4  | ST3   | 7.74231E-06 | 86.796  |
| 5.49 | ST4   | 7.89123E-06 | 106.569 |
| 5.53 | ST5   | 7.6837E-06  | 108.867 |
| 5.6  | ST6   | 8.4713E-06  | 78.804  |
| 5.65 | ST7   | 8.70157E-06 | 81.74   |
| 5.71 | ST8   | 7.66247E-06 | 70.821  |
| 5.76 | ST9   | 8.37142E-06 | 107.116 |
| 5.8  | ST10  | 8.71512E-06 | 105.015 |
| 5.84 | ST11  | 8.55031E-06 | 106.704 |
| 5.88 | ST12  | 8.00334E-06 | 69.866  |
| 5.92 | ST13  | 8.50249E-06 | 81.675  |
| 5.97 | ST14  | 8.50998E-06 | 80.325  |
| 6.01 | ST15  | 8.16175E-06 | 75.16   |
| 6.06 | ST16  | 8.87086E-06 | 79.528  |
| 6.1  | ST17  | 8.67142E-06 | 73.414  |

|      |       |             |         |
|------|-------|-------------|---------|
| 6.15 | ST18  | 8.72787E-06 | 81.323  |
| 6.2  | ST19  | 8.62469E-06 | 78.148  |
| 6.25 | ST20  | 9.49319E-06 | 80.262  |
| 6.3  | ST21  | 9.2451E-06  | 80.422  |
| 6.35 | ST22  | 9.3249E-06  | 75.93   |
| 6.4  | ST23  | 9.26533E-06 | 76.294  |
| 6.45 | ST24  | 8.85747E-06 | 76.256  |
| 6.5  | ST25  | 8.18453E-06 | 79.358  |
| 6.55 | ST26  | 9.06685E-06 | 76.077  |
| 6.6  | ST27  | 1.00343E-05 | 81.543  |
| 6.65 | ST28  | 9.99865E-06 | 80.485  |
| 6.7  | ST29  | 9.89189E-06 | 89.172  |
| 6.75 | ST30  | 9.66032E-06 | 93.129  |
| 6.8  | ST31  | 9.18224E-06 | 80.628  |
| 6.85 | ST32  | 8.43888E-06 | 76.773  |
| 6.9  | ST33  | 8.16577E-06 | 77.667  |
| 6.95 | ST34  | 9.66771E-06 | 84.902  |
| 7    | ST35  | 9.8878E-06  | 91.912  |
| 7.04 | ST36  | 9.753E-06   | 95.607  |
| 7.09 | ST37  | 9.2761E-06  | 79.758  |
| 7.13 | ST38  | 1.0259E-05  | 91.171  |
| 7.18 | ST39  | 8.42434E-06 | 79.047  |
| 7.25 | ST40  | 8.35561E-06 | 115.406 |
| 7.36 | ST41  | 1.14253E-05 | 133.291 |
| 7.46 | ST42  | 1.08799E-05 | 118.286 |
| 7.55 | ST43  | 8.18621E-06 | 79.894  |
| 7.61 | ST44  | 9.47207E-06 | 84.544  |
| 7.65 | ST45  | 1.12552E-05 | 123.898 |
| 7.68 | ST46  | 1.1429E-05  | 108.122 |
| 7.73 | ST47  | 1.16688E-05 | 87.406  |
| 7.8  | ST48  | 9.66985E-06 | 77.31   |
| 7.87 | ST49  | 9.91593E-06 | 83.204  |
| 7.94 | ST50  | 9.97166E-06 | 81.649  |
| 8.01 | ST51  | 1.05895E-05 | 80.943  |
| 8.08 | ST52  | 1.21341E-05 | 85.481  |
| 8.15 | ST53  | 1.17715E-05 | 80.455  |
| 8.22 | ST54  | 1.20708E-05 | 78.955  |
| 8.29 | ST55  | 9.92636E-06 | 79.432  |
| 8.36 | ST56  | 1.04424E-05 | 78.515  |
| 8.45 | ST57  | 1.19055E-05 | 101.533 |
| 8.57 | ST58  | 1.15113E-05 | 108.355 |
| 8.69 | ST59  | 1.30147E-05 | 115.579 |
| 8.79 | ST60  | 9.05865E-06 | 83.944  |
| 8.87 | ST61  | 8.86627E-06 | 85.592  |
| 8.95 | ST62  | 1.09825E-05 | 99.824  |
| 9.02 | ST63  | 1.06115E-05 | 114.458 |
| 9.09 | ST64  | 1.09077E-05 | 119.076 |
| 9.16 | ST189 | 1.07877E-05 | 88.14   |
| 9.22 | ST190 | 9.46597E-06 | 85.508  |
| 9.28 | ST191 | 8.97564E-06 | 91.347  |
| 9.33 | ST192 | 1.18215E-05 | 128.457 |
| 9.38 | ST193 | 1.19446E-05 | 122.547 |
| 9.43 | ST194 | 1.09268E-05 | 115.89  |
| 9.51 | ST195 | 1.23776E-05 | 107.021 |
| 9.58 | ST196 | 1.00012E-05 | 91.934  |
| 9.65 | ST197 | 8.18969E-06 | 83.05   |



|       |         |             |         |
|-------|---------|-------------|---------|
| 9.72  | ST198   | 1.22044E-05 | 92.845  |
| 9.78  | ST199   | 1.27715E-05 | 116.819 |
| 9.84  | ST200   | 1.27046E-05 | 115.668 |
| 9.89  | ST201   | 7.93999E-06 | 83.428  |
| 9.94  | ST202   | 7.99671E-06 | 82.552  |
| 9.99  | ST203   | 7.90253E-06 | 82.98   |
| 10.05 | ST204   | 8.24674E-06 | 86.51   |
| 10.1  | ST205   | 8.04087E-06 | 87.778  |
| 10.15 | ST206   | 8.44073E-06 | 91.075  |
| 10.21 | ST207   | 7.58551E-06 | 85.86   |
| 10.26 | ST208   | 7.91025E-06 | 80.533  |
| 10.31 | ST209   | 7.85355E-06 | 75.655  |
| 10.38 | ST65    | 1.1087E-05  | 105.531 |
| 10.43 | ST66    | 1.13005E-05 | 110.721 |
| 10.48 | ST67    | 1.07874E-05 | 114.462 |
| 10.53 | ST68    | 9.89579E-06 | 87.511  |
| 10.58 | ST69    | 7.6928E-06  | 84.417  |
| 10.63 | ST70    | 1.09187E-05 | 120.9   |
| 10.7  | ST71    | 1.1201E-05  | 128.075 |
| 10.77 | ST72    | 1.19598E-05 | 136.735 |
| 10.84 | ST73    | 1.12305E-05 | 130.755 |
| 10.89 | ST74    | 1.09638E-05 | 113.094 |
| 10.94 | ST75    | 8.06623E-06 | 84.837  |
| 10.98 | ST76    | 6.26965E-06 | 82.936  |
| 11.04 | ST77    | 1.11663E-05 | 114.485 |
| 11.1  | ST78    | 1.14269E-05 | 120.731 |
| 11.16 | ST79    | 1.25556E-05 | 104.451 |
| 11.23 | ST80    | 9.53234E-06 | 96.407  |
| 11.27 | ST81    | 7.39764E-06 | 77.815  |
| 11.31 | ST82    | 6.38315E-06 | 78.569  |
| 11.37 | ST83    | 8.75142E-06 | 152.745 |
| 11.47 | ST84    | 1.01356E-05 | 143.102 |
| 11.57 | ST85    | 9.27965E-06 | 136.267 |
| 11.66 | ST86    | 1.28295E-05 | 129.376 |
| 11.73 | ST87    | 1.01102E-05 | 88.858  |
| 11.79 | ST88    | 7.61266E-06 | 77.67   |
| 11.85 | ST89    | 8.5893E-06  | 85.953  |
| 11.91 | ST90    | 1.28525E-05 | 136.919 |
| 11.97 | ST91    | 1.30793E-05 | 140.868 |
| 12.03 | ST92    | 1.113E-05   | 137.7   |
| 12.09 | ST93    | 9.73047E-06 | 104.51  |
| 12.14 | ST94    | 9.13617E-06 | 88.701  |
| 12.19 | ST95    | 7.70385E-06 | 104.078 |
| 12.25 | ST96    | 1.12064E-05 | 133.795 |
| 12.31 | ST97    | 1.17248E-05 | 142.358 |
| 12.37 | ST98    | 1.18798E-05 | 125.803 |
| 12.44 | ST18M2  | 1.09935E-05 | 107.727 |
| 12.5  | ST18M3  | 9.00156E-06 | 81.912  |
| 12.56 | ST18M4  | 1.13864E-05 | 71.278  |
| 12.63 | ST18L2  | 1.22484E-05 | 138.899 |
| 12.69 | ST18L3  | 1.16443E-05 | 129.432 |
| 12.75 | ST18L4  | 1.05336E-05 | 123.85  |
| 12.82 | ST19MA2 | 8.28635E-06 | 100.254 |
| 12.88 | ST19MA3 | 8.07623E-06 | 75.848  |
| 12.94 | ST19MA4 | 9.72744E-06 | 85.176  |
| 13.01 | ST19LA2 | 1.19423E-05 | 79.168  |

|       |         |             |         |
|-------|---------|-------------|---------|
| 13.07 | ST19LA3 | 1.17094E-05 | 86.651  |
| 13.13 | ST19LA4 | 1.13249E-05 | 80.423  |
| 13.2  | ST19MB2 | 1.10742E-05 | 79.779  |
| 13.27 | ST19MB3 | 1.03205E-05 | 77.346  |
| 13.34 | ST19MB4 | 1.10632E-05 | 81.087  |
| 13.4  | ST19LB2 | 1.15623E-05 | 83.508  |
| 13.46 | ST19LB3 | 1.35367E-05 | 87.163  |
| 13.52 | ST19LB4 | 1.16045E-05 | 92.032  |
| 13.59 | ST19CM2 | 1.09047E-05 | 79.679  |
| 13.65 | ST19CM3 | 9.17935E-06 | 78.186  |
| 13.71 | ST19CM4 | 1.04711E-05 | 79.741  |
| 13.79 | ST19LC2 | 1.1808E-05  | 112.776 |
| 13.87 | ST19LC3 | 1.31122E-05 | 118.66  |
| 13.95 | ST19LC4 | 1.04412E-05 | 128.651 |
| 14.01 | ST20M1  | 8.56562E-06 | 109.035 |
| 14.04 | ST20M2  | 6.88485E-06 | 83.838  |
| 14.07 | ST20M3  | 8.40984E-06 | 96.422  |
| 14.12 | ST20L2  | 8.95915E-06 | 126.716 |
| 14.17 | ST20L3  | 9.93804E-06 | 134.469 |
| 14.22 | ST20L4  | 8.24838E-06 | 127.525 |
| 14.28 | ST21M2  | 1.15677E-05 | 94.24   |
| 14.35 | ST21M3  | 8.66368E-06 | 73.626  |
| 14.42 | ST21M4  | 9.02189E-06 | 82.293  |
| 14.49 | ST21L2  | 1.19172E-05 | 123.862 |
| 14.54 | ST21L3  | 1.26382E-05 | 131.778 |
| 14.59 | ST21L4  | 9.96197E-06 | 130.698 |
| 14.67 | ST22MA2 | 9.32953E-06 | 94.412  |
| 14.74 | ST22MA4 | 8.53489E-06 | 78.651  |
| 14.81 | ST22MA5 | 9.66145E-06 | 74.388  |
| 14.86 | ST22LA2 | 1.22212E-05 | 100.578 |
| 14.89 | ST22LA3 | 1.30771E-05 | 98.638  |
| 14.92 | ST22LA4 | 1.29555E-05 | 96.336  |
| 14.98 | ST22MB3 | 1.17551E-05 | 88.162  |
| 15.08 | ST22MB5 | 1.0528E-05  | 87.358  |
| 15.18 | ST22MB7 | 1.12813E-05 | 83.946  |
| 15.25 | ST22LB2 | 1.10754E-05 | 111.741 |
| 15.28 | ST22LB3 | 1.30442E-05 | 111.783 |
| 15.31 | ST22LB4 | 1.16427E-05 | 102.544 |
| 15.36 | ST22MC1 | 1.15868E-05 | 89.71   |
| 15.43 | ST22MC2 | 1.0525E-05  | 88.209  |
| 15.5  | ST22MC3 | no data     | 88.811  |
| 15.55 | ST22LC1 | no data     | 117.445 |
| 15.58 | ST22LC2 | 1.10233E-05 | 128.805 |
| 15.66 | ST22LC3 | 1.36293E-05 | 132.062 |
| 15.73 | ST22LC4 | 9.63581E-06 | 136.777 |
| 15.79 | 240     | 1.03203E-05 | 85.79   |
| 15.85 | 241     | 9.10531E-06 | 83.815  |
| 15.91 | 242     | 1.07087E-05 | 80.945  |
| 15.97 | 243     | 1.03059E-05 | 106.976 |
| 16.02 | 244     | 1.19769E-05 | 111.713 |
| 16.07 | 245     | 1.12663E-05 | 105.761 |
| 16.14 | 246     | 9.73822E-06 | 87.226  |
| 16.22 | 247     | 8.64768E-06 | 79.015  |
| 16.3  | 248     | 6.4875E-06  | 77.376  |
| 16.35 | 249     | 9.0188E-06  | 81.829  |
| 16.4  | 250     | 1.10888E-05 | 112.454 |

|       |         |             |         |
|-------|---------|-------------|---------|
| 16.45 | 251     | 1.08155E-05 | 114.033 |
| 16.5  | 252     | 1.00186E-05 | 93.459  |
| 16.55 | 253     | 9.81145E-06 | 83.411  |
| 16.6  | 254     | 9.68022E-06 | 80.324  |
| 16.65 | 255     | 1.05962E-05 | 84.825  |
| 16.7  | 256     | 1.00006E-05 | 80.944  |
| 16.75 | 257     | 1.2269E-05  | 86.286  |
| 16.8  | 258     | 1.17738E-05 | 86.618  |
| 16.85 | 259     | 1.05164E-05 | 82.71   |
| 16.9  | 260     | 1.13241E-05 | 80.845  |
| 16.95 | 261     | 1.10792E-05 | 81.754  |
| 17    | 262     | 1.13184E-05 | 81.712  |
| 17.05 | 263     | 1.17266E-05 | 90.586  |
| 17.1  | 264     | 1.10982E-05 | 92.71   |
| 17.15 | ST24MC3 | no data     | 90.243  |
| 17.19 | ST24L2  | 0.00001     | 113.907 |
| 17.25 | ST24L3  | 1.10792E-05 | 119.58  |
| 17.31 | ST24L4  | 8.50817E-06 | 121.363 |
| 17.38 | ST268   | 9.66138E-06 | 109.906 |
| 17.46 | ST269   | 7.2209E-06  | 92.909  |
| 17.54 | ST270   | 7.21123E-06 | 122.941 |
| 17.6  | ST271   | 7.29711E-06 | 112.022 |
| 17.63 | ST272   | 9.57486E-06 | 123.841 |
| 17.66 | ST273   | 9.20332E-06 | 118.406 |
| 17.73 | ST274   | 1.0908E-05  | 107.153 |
| 17.85 | ST275   | 8.00115E-06 | 95.81   |
| 17.97 | ST276   | 9.087E-06   | 96.681  |
| 18.06 | ST277   | 8.18191E-06 | 94.385  |
| 18.09 | ST278   | 1.14392E-05 | 115.114 |
| 18.12 | ST279   | 1.11452E-05 | 120.122 |
| 18.16 | ST280   | 8.18408E-06 | 106.191 |
| 18.21 | ST281   | 7.43684E-06 | 131.074 |
| 18.26 | ST282   | 7.98852E-06 | 136.491 |
| 18.32 | ST283   | 7.36964E-06 | 123.721 |
| 18.35 | ST284   | 1.26534E-05 | 137.742 |
| 18.38 | ST285   | 8.02415E-06 | 137.483 |
| 18.42 | ST286   | 9.12466E-06 | 139.475 |
| 18.47 | ST287   | 7.68197E-06 | 138.792 |
| 18.52 | ST288   | 1.03082E-05 | 141.194 |
| 18.6  | ST289   | 7.86406E-06 | 143.401 |
| 18.7  | ST290   | 8.09692E-06 | 145.393 |
| 18.78 | ST291   | 9.66814E-06 | 131.594 |
| 18.83 | ST292   | 7.86432E-06 | 104.158 |
| 18.88 | ST293   | 9.21539E-06 | 138.488 |
| 18.94 | ST294   | 8.22598E-06 | 137.03  |
| 19.01 | ST295   | 9.40489E-06 | 139.943 |
| 19.08 | ST296   | 1.00384E-05 | 121.654 |
| 19.16 | ST297   | 8.08786E-06 | 104.215 |
| 19.24 | ST298   | 7.93829E-06 | 100.848 |
| 19.31 | ST299   | 1.08363E-05 | 135.918 |
| 19.38 | ST300   | 1.1977E-05  | 142.815 |
| 19.45 | ST301   | 8.61761E-06 | 138.217 |
| 19.52 | ST302   | 9.79555E-06 | 148.616 |
| 19.58 | ST303   | 1.00304E-05 | 105.657 |
| 19.64 | ST304   | 8.5068E-06  | 84.758  |
| 19.71 | ST305   | 1.0782E-05  | 100.607 |



|       |       |             |         |
|-------|-------|-------------|---------|
| 19.78 | ST306 | 1.26806E-05 | 122.273 |
| 19.87 | ST307 | 1.18391E-05 | 113.48  |
| 19.95 | ST308 | 8.68172E-06 | 88.704  |
| 20.03 | ST309 | 8.42959E-06 | 81.464  |
| 20.11 | ST310 | 1.1565E-05  | 127.869 |
| 20.19 | ST311 | 9.0031E-06  | 139.74  |
| 20.24 | ST312 | 1.16767E-05 | 131.266 |
| 20.27 | ST313 | 1.02706E-05 | 102.468 |
| 20.3  | ST314 | 9.10602E-06 | 82.365  |
| 20.37 | ST315 | 1.02091E-05 | 145.283 |
| 20.46 | ST316 | 1.23915E-05 | 158.989 |
| 20.55 | ST317 | 9.06889E-06 | 147.858 |
| 20.63 | ST318 | 1.06683E-05 | 122.359 |
| 20.7  | ST319 | 8.84106E-06 | 90.673  |
| 20.77 | ST320 | 8.47331E-06 | 89.228  |
| 20.83 | ST321 | 9.28094E-06 | 95.702  |
| 20.88 | ST322 | 1.21715E-05 | 127.544 |
| 20.93 | ST323 | 1.05003E-05 | 114.968 |
| 21.01 | ST324 | 9.09551E-06 | 101.088 |
| 21.1  | ST325 | 8.57903E-06 | 84.141  |
| 21.19 | ST326 | 9.14246E-06 | 80.179  |
| 21.26 | ST327 | 1.1917E-05  | 102.259 |
| 21.3  | ST328 | 8.46159E-06 | 139.61  |
| 21.34 | ST329 | 1.10946E-05 | 123.08  |
| 21.39 | ST330 | 9.67204E-06 | 90.013  |
| 21.46 | ST331 | 7.9265E-06  | 75.234  |
| 21.53 | ST332 | 6.81239E-06 | 76.673  |
| 21.61 | ST333 | 1.16855E-05 | 140.002 |
| 21.69 | ST334 | 1.45418E-05 | 147.725 |
| 21.78 | ST335 | 8.59826E-06 | 137.585 |
| 21.84 | ST336 | 1.13629E-05 | 102.931 |
| 21.89 | ST337 | 9.75887E-06 | 91.144  |
| 21.94 | ST338 | 8.72187E-06 | 72.726  |
| 22    | ST339 | 1.10461E-05 | 89.264  |
| 22.06 | ST340 | 1.30876E-05 | 84.428  |
| 22.11 | ST341 | 1.17539E-05 | 110.752 |
| 22.19 | ST342 | 9.23814E-06 | 82.476  |
| 22.26 | ST343 | 9.01362E-06 | 81.369  |
| 22.33 | ST344 | 1.06887E-05 | 84.002  |
| 22.4  | ST345 | 1.11698E-05 | 84.704  |
| 22.44 | ST346 | 1.34191E-05 | 109.739 |
| 22.48 | ST347 | 1.28092E-05 | 110.236 |

Table S2. Bed thickness and limestone-marl thickness ratio of each couplet of the Santiurde interval studied in detail. Stratigraphic location of the samples and their whole-rock mineralogy and organic geochemistry

| Bed     | Strat high (m) | Bed thickness (cm) | L/M ratio | Whole-rock mineralogy |        |          |         |           |         | Organic geochemistry |                                        |                   |                                        |
|---------|----------------|--------------------|-----------|-----------------------|--------|----------|---------|-----------|---------|----------------------|----------------------------------------|-------------------|----------------------------------------|
|         |                |                    |           | %Quartz               | %Clays | %Calcite | %Gypsum | %Dolomite | %Pyrite | %N <sub>org</sub>    | $\delta^{15}\text{N}_{\text{org}}$ (‰) | %C <sub>org</sub> | $\delta^{13}\text{C}_{\text{org}}$ (‰) |
| ST 18M  | 12.5           | 20                 | 0.95      | 13                    | 41     | 36       | 1       | 0         | 9       | 0.07                 | 2.63                                   | 1.94              | -28.90                                 |
| ST 18L  | 12.69          | 19                 |           | 5                     | 9      | 83       | 0       | 0         | 3       | 0.02                 | 2.05                                   | 0.38              | -27.79                                 |
| ST 18AM | 12.88          | 19                 | 1.00      | 13                    | 44     | 33       | 1       | 0         | 9       | 0.09                 | 3.09                                   | 2.86              | -29.00                                 |
| ST 18AL | 13.07          | 19                 |           | 9                     | 32     | 57       | 0       | 0         | 2       | 0.06                 | 1.69                                   | 2.78              | -28.74                                 |
| ST 18BM | 13.27          | 20                 | 0.95      | 10                    | 35     | 45       | 1       | 0.5       | 9       | 0.08                 | 2.76                                   | 3.30              | -29.17                                 |
| ST 18BL | 13.46          | 19                 |           | 9                     | 25     | 61       | 0       | 1         | 4       | 0.05                 | 2.00                                   | 1.63              | -28.29                                 |
| ST 19M  | 13.65          | 20                 | 1.15      | 11                    | 40     | 44       | 1       | 0         | 4       | 0.07                 | 2.90                                   | 2.84              | -29.27                                 |
| ST 19L  | 13.87          | 23                 |           | 3                     | 11     | 84       | 0       | 0         | 2       | 0.02                 | 1.05                                   | 0.30              | -27.64                                 |
| ST 20M  | 14.04          | 11                 | 1.36      | 12                    | 50     | 28       | 0       | 4         | 6       | 0.09                 | 3.11                                   | 2.54              | -29.14                                 |
| ST 20L  | 14.17          | 15                 |           | 3                     | 13     | 82       | 0       | 0         | 2       | 0.02                 | 2.44                                   | 0.26              | -27.22                                 |
| ST 21M  | 14.35          | 21                 | 0.81      | 12                    | 45     | 32       | 1       | 2         | 8       | 0.09                 | 3.18                                   | 3.41              | -29.56                                 |
| ST 21L  | 14.54          | 17                 |           | 4                     | 15     | 79       | 0       | 0         | 2       | 0.02                 | 2.78                                   | 0.30              | -27.68                                 |
| ST 21AM | 14.74          | 22                 | 0.36      | 10                    | 37     | 44       | 0.5     | 2         | 7       | 0.08                 | 3.21                                   | 4.03              | -29.48                                 |
| ST 21AL | 14.89          | 8                  |           | 10                    | 29     | 55       | 0       | 2         | 4       | 0.04                 | 1.90                                   | 1.00              | -27.78                                 |
| ST 21BM | 15.08          | 30                 | 0.33      | 9                     | 43     | 48       | 0.5     | 0         | 0.5     | 0.07                 | 2.95                                   | 2.30              | -28.91                                 |
| ST 21BL | 15.28          | 10                 |           | 10                    | 30     | 54       | 0       | 2         | 4       | 0.04                 | 2.07                                   | 1.02              | -28.03                                 |
| ST 22M  | 15.43          | 20                 | 1.15      | 10                    | 47     | 38       | 0       | 2         | 3       | 0.07                 | 2.80                                   | 2.35              | -29.21                                 |
| ST 22L  | 15.73          | 23                 |           | 3                     | 14     | 81       | 0       | 0         | 2       | 0.02                 | 1.96                                   | 0.37              | -27.95                                 |
| ST 22AM | 15.85          | 19                 |           | 12                    | 48     | 36       | 0       | 0         | 4       | 0.08                 | 2.96                                   | 2.58              | -29.05                                 |

Table S3. Stratigraphic location of the Santiurde samples and their %CaCO<sub>3</sub>, δ<sup>13</sup>C<sub>carb</sub> and δ<sup>18</sup>O<sub>carb</sub> values.

| Strat general (m) | Sample code | CaCO <sub>3</sub> (%) | δ <sup>13</sup> C <sub>carb</sub> (‰) | δ <sup>18</sup> O <sub>carb</sub> (‰) |
|-------------------|-------------|-----------------------|---------------------------------------|---------------------------------------|
| 12.44             | ST18M2      | 41.14                 | -0.298                                | -5.504                                |
| 12.5              | ST18M3      | 27.35                 | -0.029                                | -5.351                                |
| 12.56             | ST18M4      | 29.33                 | 0.696                                 | -5.562                                |
| 12.63             | ST18L2      | 78.76                 | -1.495                                | -5.376                                |
| 12.69             | ST18L3      | 88.97                 | -0.753                                | -5.75                                 |
| 12.75             | ST18L4      | 77.84                 | -0.577                                | -5.663                                |
| 12.82             | ST19MA2     | 30.6                  | -0.355                                | -5.668                                |
| 12.88             | ST19MA3     | 24.63                 | -0.174                                | -5.453                                |
| 12.94             | ST19MA4     | 28.33                 | -0.105                                | -5.574                                |
| 13.01             | ST19LA2     | 32.26                 | -0.07                                 | -5.498                                |
| 13.07             | ST19LA3     | 48.41                 | 0.031                                 | -5.477                                |
| 13.13             | ST19LA4     | 42.91                 | -0.016                                | -5.246                                |
| 13.2              | ST19MB2     | 34.69                 | -0.237                                | -5.673                                |
| 13.27             | ST19MB3     | 37.07                 | 0.001                                 | -5.535                                |
| 13.34             | ST19MB4     | 38.37                 | -0.057                                | -5.547                                |
| 13.4              | ST19LB2     | 56.42                 | -0.031                                | -5.497                                |
| 13.46             | ST19LB3     | 55.78                 | 0.008                                 | -5.398                                |
| 13.52             | ST19LB4     | 57.05                 | -0.211                                | -5.487                                |
| 13.59             | ST19CM2     | 43.05                 | -0.183                                | -5.492                                |
| 13.65             | ST19CM3     | 36.17                 | 0.026                                 | -5.594                                |
| 13.71             | ST19CM4     | 45.33                 | -0.034                                | -5.291                                |
| 13.79             | ST19LC2     | 50.09                 | -0.767                                | -5.698                                |
| 13.87             | ST19LC3     | 81.97                 | -1.093                                | -5.451                                |
| 13.95             | ST19LC4     | 78.53                 | -0.612                                | -5.664                                |
| 14.01             | ST20M1      | 35.91                 | -0.292                                | -5.555                                |
| 14.04             | ST20M2      | 26.05                 | -0.444                                | -5.416                                |
| 14.07             | ST20M3      | 40.47                 | -0.088                                | -5.407                                |
| 14.12             | ST20L2      | 81.83                 | -1.015                                | -5.649                                |
| 14.17             | ST20L3      | 81.59                 | -1.026                                | -5.658                                |
| 14.22             | ST20L4      | 77.23                 | -0.549                                | -5.649                                |
| 14.28             | ST21M2      | 33.83                 | -0.163                                | -5.578                                |
| 14.35             | ST21M3      | 27.72                 | -0.252                                | -5.474                                |
| 14.42             | ST21M4      | 43.21                 | -0.428                                | -5.649                                |
| 14.49             | ST21L2      | 77.36                 | -0.647                                | -5.53                                 |
| 14.54             | ST21L3      | 81.56                 | -0.538                                | -5.723                                |
| 14.59             | ST21L4      | 79.92                 | -0.468                                | -5.643                                |
| 14.67             | ST22MA2     | 30.78                 | -0.111                                | -5.42                                 |
| 14.74             | ST22MA4     | 30.2                  | -0.008                                | -5.333                                |
| 14.81             | ST22MA5     | 42.58                 | -0.199                                | -5.588                                |
| 14.86             | ST22LA2     | 51.77                 | -0.115                                | -5.613                                |
| 14.89             | ST22LA3     | 53.1                  | -0.027                                | -5.403                                |
| 14.92             | ST22LA4     | 52.34                 | -0.091                                | -5.504                                |
| 14.98             | ST22MB3     | 40.04                 | 0.167                                 | -5.436                                |



|       |         |       |        |        |
|-------|---------|-------|--------|--------|
| 15.08 | ST22MB5 | 38.64 | 0.137  | -5.422 |
| 15.18 | ST22MB7 | 40.07 | -0.113 | -5.466 |
| 15.25 | ST22LB2 | 58.89 | -0.239 | -5.541 |
| 15.28 | ST22LB3 | 56.07 | -0.178 | -5.552 |
| 15.31 | ST22LB4 | 45.23 | -0.036 | -5.429 |
| 15.36 | ST22MC1 | 31.83 | 0.425  | -5.399 |
| 15.43 | ST22MC2 | 31.41 | 0.107  | -5.546 |
| 15.5  | ST22MC3 | 40.66 | -0.036 | -5.289 |
| 15.58 | ST22LC2 | 83.26 | -0.746 | -5.843 |
| 15.66 | ST22LC3 | 82.17 | -0.951 | -5.598 |
| 15.73 | ST22LC4 | 80.43 | -1.092 | -5.727 |
| 15.79 | ST22AM2 | 31.42 | 0.248  | -5.373 |
| 15.85 | ST22AM3 | 31.45 | 0.355  | -5.302 |
| 15.91 | ST22AM4 | 33.41 | 0.365  | -5.256 |

Table S4. Stratigraphic location of the Santiurde samples and their major and trace element content

| Bed                     | Strat high (m) | SiO <sub>2</sub> | TiO <sub>2</sub> | Al <sub>2</sub> O <sub>3</sub> | CaO   | Fe <sub>2</sub> O <sub>3</sub> | K <sub>2</sub> O | MgO  | MnO  | Na <sub>2</sub> O | P <sub>2</sub> O <sub>5</sub> | LOI  | Co   | Cr   | Cu   | Ni   | Sr   | V    | Zn   |
|-------------------------|----------------|------------------|------------------|--------------------------------|-------|--------------------------------|------------------|------|------|-------------------|-------------------------------|------|------|------|------|------|------|------|------|
|                         |                | %                | %                | %                              | %     | %                              | %                | %    | %    | %                 | %                             | %    | %    | ppm  | ppm  | ppm  | ppm  | ppm  | ppm  |
| ST 18M                  | 12.5           | 31.63            | 0.54             | 14.07                          | 19.43 | 6.23                           | 3.33             | 1.53 | 0.02 | 0.66              | 0.13                          | 22.9 | 11.0 | 78.3 | 88.4 | 62.0 | 392  | 156  | 981  |
| ST 18L                  | 12.69          | 9.39             | 0.18             | 5.41                           | 44.50 | 3.42                           | 0.36             | 0.98 | 0.02 | 0.15              | 0.05                          | 35.4 | 2.44 | 31.5 | 26.5 | 10.7 | 380  | 35.0 | 11.5 |
| ST 18AM                 | 12.88          | 32.98            | 0.60             | 15.25                          | 15.73 | 6.27                           | 3.87             | 1.91 | 0.02 | 0.52              | 0.12                          | 22.9 | 11.3 | 99.3 | 68.7 | 67.7 | 398  | 206  | 298  |
| ST 18AL                 | 13.07          | 22.43            | 0.38             | 11.81                          | 27.99 | 4.51                           | 1.93             | 1.58 | 0.02 | 0.43              | 0.07                          | 28.7 | 5.27 | 86.3 | 34.0 | 29.9 | 527  | 115  | 34.3 |
| ST 18BM                 | 13.27          | 25.14            | 0.47             | 13.02                          | 23.51 | 5.90                           | 2.89             | 1.82 | 0.03 | 0.46              | 0.11                          | 27.2 | 8.99 | 79.7 | 66.8 | 83.8 | 419  | 235  | 1058 |
| ST 18BL                 | 13.46          | 21.16            | 0.34             | 8.66                           | 31.93 | 4.35                           | 1.62             | 1.65 | 0.02 | 0.46              | 0.07                          | 29.5 | 6.27 | 81.6 | 53.9 | 37.8 | 203  | 101  | 36.5 |
| ST 19M                  | 13.65          | 29.30            | 0.51             | 11.81                          | 22.79 | 5.40                           | 2.88             | 1.79 | 0.03 | 0.67              | 0.11                          | 25.5 | 10.5 | 92.4 | 76.9 | 86.2 | 280  | 247  | 319  |
| ST 19L                  | 13.87          | 7.67             | 0.16             | 4.83                           | 46.19 | 2.92                           | 0.48             | 1.08 | 0.03 | 0.17              | 0.04                          | 36.8 | 2.78 | 29.4 | 27.3 | 16.8 | 298  | 45.1 | 12.7 |
| ST 20M                  | 14.04          | 34.77            | 0.68             | 13.97                          | 14.73 | 6.97                           | 3.79             | 2.42 | 0.03 | 0.56              | 0.17                          | 21.3 | 13.9 | 103  | 87.1 | 71.0 | 336  | 219  | 281  |
| ST 20L                  | 14.17          | 8.02             | 0.18             | 5.34                           | 46.34 | 3.16                           | 0.37             | 1.08 | 0.03 | 0.14              | 0.04                          | 36.2 | 3.29 | 30.6 | 17.3 | 15.1 | 327  | 37.8 | 12.3 |
| ST 21M                  | 14.35          | 2.70             | 0.02             | 0.52                           | 68.97 | 0.30                           | 0.10             | 3.70 | 0.01 | 0.05              | 0.03                          | 24.3 | <LMD | 8.4  | 8.08 | 9.28 | 684  | 9.8  | 34.7 |
| ST 21L                  | 14.54          | 8.89             | 0.18             | 5.64                           | 44.72 | 3.25                           | 0.35             | 1.15 | 0.03 | 0.17              | 0.06                          | 35.6 | 3.02 | 33.0 | 21.6 | 13.4 | 421  | 47.6 | 15.7 |
| ST 21AM                 | 14.74          | 25.56            | 0.44             | 11.49                          | 23.40 | 6.16                           | 2.57             | 1.75 | 0.03 | 0.58              | 0.12                          | 27.6 | 9.08 | 87.7 | 94.4 | 97.7 | 383  | 240  | 358  |
| ST 21AL                 | 14.89          | 22.26            | 0.38             | 11.21                          | 29.34 | 5.14                           | 1.89             | 1.85 | 0.03 | 0.45              | 0.08                          | 27.5 | 5.67 | 73.3 | 42.0 | 24.8 | 592  | 85.3 | 36.4 |
| ST 21BM                 | 15.08          | 26.17            | 0.46             | 12.56                          | 23.99 | 5.06                           | 2.87             | 1.72 | 0.03 | 0.48              | 0.11                          | 26.0 | 8.29 | 88.1 | 56.4 | 43.2 | 434  | 134  | 50.5 |
| ST 21BL                 | 15.28          | 22.10            | 0.37             | 9.73                           | 31.42 | 4.73                           | 1.59             | 1.84 | 0.03 | 0.45              | 0.08                          | 28.5 | 5.78 | 68.5 | 36.2 | 26.1 | 397  | 78.9 | 36.6 |
| ST 22M                  | 15.43          | 29.22            | 0.51             | 12.76                          | 21.18 | 5.11                           | 2.95             | 1.85 | 0.03 | 0.65              | 0.12                          | 25.1 | 8.99 | 86.4 | 64.1 | 49.9 | 432  | 168  | 484  |
| ST 22L                  | 15.73          | 8.38             | 0.17             | 5.32                           | 46.17 | 2.90                           | 0.34             | 1.05 | 0.03 | 0.15              | 0.09                          | 36.4 | 2.54 | 35.5 | 18.4 | 13.1 | 474  | 41.7 | 15.1 |
| ST 22AM                 | 15.85          | 32.41            | 0.55             | 14.11                          | 17.61 | 5.86                           | 3.56             | 1.83 | 0.03 | 0.56              | 0.12                          | 22.8 | 9.68 | 96.1 | 61.0 | 51.2 | 461  | 187  | 70.5 |
| <b>LMD (ppb)</b>        |                | 774              | 0.90             | 11.3                           | 188   | 18.5                           | 112              | 2.15 | 0.07 | 15.2              | 64.4                          |      | 1.40 | 2.92 | 57.0 | 44.6 | 1.30 | 1.17 | 5.94 |
| <b>BCR-2 mean (n=4)</b> |                | 94               | 100              | 99                             | 101   | 98                             | 102              | 97   | 101  | 104               | 84                            |      | 106  | 107  | 93   | 85   | 107  | 105  | 105  |
| <b>ERROR</b>            |                | 0.03             | 0.05             | 0.05                           | 0.04  | 0.04                           | 0.06             | 0.05 | 0.04 | 0.04              | 0.04                          |      | 0.05 | 0.05 | 0.34 | 0.41 | 0.05 | 0.05 | 0.05 |

| Bed                     | Strat high (m) | La   | Ce   | Pr   | Nd   | Sm   | Eu   | Gd   | Tb    | Dy    | Ho    | Er    | Tm    | Yb    | Lu    |
|-------------------------|----------------|------|------|------|------|------|------|------|-------|-------|-------|-------|-------|-------|-------|
|                         |                | ppm   | ppm   | ppm   | ppm   | ppm   | ppm   | ppm   |
| ST 18M                  | 12.5           | 38.4 | 62.9 | 7.62 | 27.0 | 4.93 | 0.97 | 4.41 | 0.66  | 3.82  | 0.64  | 2.16  | 0.38  | 2.38  | 0.43  |
| ST 18L                  | 12.69          | 20.4 | 35.6 | 4.85 | 20.2 | 4.15 | 0.82 | 3.88 | 0.58  | 3.21  | 0.52  | 1.70  | 0.28  | 1.59  | 0.28  |
| ST 18AM                 | 12.88          | 47.0 | 76.6 | 9.33 | 31.8 | 5.38 | 0.97 | 4.92 | 0.73  | 4.19  | 0.71  | 2.45  | 0.45  | 2.79  | 0.49  |
| ST 18AL                 | 13.07          | 29.5 | 51.9 | 6.78 | 26.7 | 5.27 | 1.03 | 4.87 | 0.73  | 4.18  | 0.69  | 2.26  | 0.38  | 2.28  | 0.40  |
| ST 18BM                 | 13.27          | 35.4 | 60.5 | 7.62 | 28.7 | 5.42 | 0.98 | 4.91 | 0.74  | 4.24  | 0.69  | 2.32  | 0.40  | 2.45  | 0.43  |
| ST 18BL                 | 13.46          | 19.8 | 32.5 | 4.31 | 16.7 | 3.25 | 0.70 | 2.91 | 0.44  | 2.47  | 0.41  | 1.36  | 0.23  | 1.40  | 0.24  |
| ST 19M                  | 13.65          | 13.9 | 22.1 | 3.01 | 12.4 | 2.49 | 0.52 | 2.37 | 0.36  | 2.04  | 0.33  | 1.09  | 0.18  | 1.04  | 0.18  |
| ST 19L                  | 13.87          | 35.7 | 55.4 | 6.67 | 22.9 | 3.98 | 0.81 | 3.75 | 0.54  | 3.14  | 0.52  | 1.82  | 0.32  | 1.98  | 0.35  |
| ST 20M                  | 14.04          | 17.7 | 29.1 | 3.97 | 16.4 | 3.30 | 0.65 | 3.08 | 0.46  | 2.62  | 0.44  | 1.44  | 0.23  | 1.35  | 0.24  |
| ST 20L                  | 14.17          | 21.7 | 37.1 | 4.54 | 16.7 | 3.19 | 0.63 | 2.89 | 0.44  | 2.57  | 0.43  | 1.47  | 0.26  | 1.58  | 0.28  |
| ST 21M                  | 14.35          | 33.4 | 55.7 | 7.52 | 31.0 | 6.38 | 1.28 | 5.93 | 0.92  | 5.23  | 0.86  | 2.78  | 0.46  | 2.69  | 0.48  |
| ST 21L                  | 14.54          | 28.7 | 52.0 | 6.97 | 27.5 | 5.52 | 1.06 | 4.96 | 0.77  | 4.39  | 0.71  | 2.34  | 0.40  | 2.36  | 0.41  |
| ST 21AM                 | 14.74          | 18.7 | 33.7 | 4.30 | 17.1 | 3.43 | 0.64 | 3.18 | 0.47  | 2.71  | 0.45  | 1.46  | 0.25  | 1.47  | 0.26  |
| ST 21AL                 | 14.89          | 39.8 | 68.6 | 8.65 | 32.6 | 6.19 | 1.20 | 5.63 | 0.85  | 4.85  | 0.80  | 2.69  | 0.46  | 2.87  | 0.50  |
| ST 21BM                 | 15.08          | 29.7 | 52.6 | 7.04 | 28.1 | 5.60 | 1.11 | 4.90 | 0.75  | 4.24  | 0.69  | 2.30  | 0.39  | 2.37  | 0.41  |
| ST 21BL                 | 15.28          | 33.1 | 55.1 | 6.81 | 24.5 | 4.42 | 0.87 | 4.00 | 0.60  | 3.49  | 0.58  | 1.97  | 0.35  | 2.12  | 0.37  |
| ST 22M                  | 15.43          | 16.2 | 27.3 | 3.86 | 16.4 | 3.43 | 0.74 | 3.26 | 0.49  | 2.73  | 0.45  | 1.42  | 0.23  | 1.34  | 0.24  |
| ST 22L                  | 15.73          | 40.3 | 66.9 | 8.14 | 28.4 | 4.93 | 0.92 | 4.47 | 0.67  | 3.86  | 0.65  | 2.26  | 0.40  | 2.45  | 0.43  |
| ST 22AM                 | 15.85          | 34.1 | 57.1 | 7.05 | 25.5 | 4.57 | 0.88 | 4.21 | 0.63  | 3.69  | 0.61  | 2.07  | 0.36  | 2.23  | 0.39  |
| <b>LMD (ppb)</b>        |                | 0.14 | 0.07 | 0.01 | 0.09 | 0.02 | 0.01 | 0.02 | 0.005 | 0.034 | 0.004 | 0.014 | 0.004 | 0.014 | 0.003 |
| <b>BCR-2 mean (n=4)</b> |                | 103  | 103  | 107  | 109  | 106  | 101  | 95   | 100   | 97    | 96    | 95    | 101   | 94    | 108   |
| <b>ERROR</b>            |                | 0.05 | 0.05 | 0.05 | 0.04 | 0.06 | 0.06 | 0.03 | 0.04  | 0.04  | 0.05  | 0.04  | 0.03  | 0.03  | 0.03  |



Table S5. Factor matrix containing the rotated factor loadings, which are equivalent to the correlation between the variable and the factor. The amount of total variance explained by each factor is also represented. Values in bold exceed 0.65; values in bold and italics are between 0.50 and 0.64.

| Rotated Component Matrix          |              |              |             |              |
|-----------------------------------|--------------|--------------|-------------|--------------|
|                                   | Factor       |              |             |              |
|                                   | 1            | 2            | 3           | 4            |
| % of variance                     | 44.54        | 25.78        | 9.92        | 7.73         |
| Cumulative %                      | 44.54        | 70.32        | 80.24       | 87.97        |
| Ni                                | <b>0.88</b>  | 0.33         | -0.14       | 0.12         |
| Co                                | <b>0.88</b>  | 0.33         | -0.01       | 0.00         |
| Cu                                | <b>0.87</b>  | 0.37         | -0.12       | 0.12         |
| P <sub>2</sub> O <sub>5</sub>     | <b>0.84</b>  | 0.40         | 0.06        | -0.15        |
| V                                 | <b>0.83</b>  | 0.49         | -0.11       | 0.02         |
| %piryte                           | <b>0.79</b>  | 0.09         | 0.11        | 0.42         |
| %C <sub>org</sub>                 | <b>0.70</b>  | <b>0.59</b>  | -0.03       | 0.08         |
| %clays                            | <b>0.66</b>  | <b>0.71</b>  | 0.06        | -0.14        |
| Zn                                | <b>0.64</b>  | 0.20         | 0.04        | <b>0.50</b>  |
| Al <sub>2</sub> O <sub>3</sub>    | <b>0.59</b>  | <b>0.74</b>  | 0.18        | 0.01         |
| Na <sub>2</sub> O                 | 0.43         | <b>0.84</b>  | -0.13       | 0.02         |
| δ <sup>13</sup> C <sub>carb</sub> | 0.17         | <b>0.95</b>  | 0.08        | 0.09         |
| Sr                                | 0.04         | 0.12         | <b>0.89</b> | -0.13        |
| MnO                               | 0.00         | 0.01         | 0.01        | <b>-0.91</b> |
| Ba                                | -0.18        | -0.07        | <b>0.91</b> | 0.16         |
| %calcite                          | <b>-0.73</b> | <b>-0.65</b> | -0.07       | 0.05         |
| δ <sup>13</sup> C <sub>org</sub>  | <b>-0.74</b> | <b>-0.60</b> | 0.09        | -0.08        |
| MS                                | <b>-0.84</b> | -0.19        | 0.16        | 0.05         |
